# Supplementary material
Source: publisher site journal article supplement (https://www.dovepress.com/article/179356)

**Table S1** Source: PubMed (Searched on: 3 April 2018)

| Search | Query                                                                                                                                                                | Items found |
|--------|----------------------------------------------------------------------------------------------------------------------------------------------------------------------|-------------|
| #297   | #34 AND #295 AND #307                                                                                                                                                | 837         |
| #296   | #62 OR #82 OR #94 OR #113 OR #146 OR #164 OR #201 OR #241 OR #251 OR #273                                                                                            | 174046      |
| #295   | #274 OR #275 OR #276 OR #277 OR #278 OR #279 OR #280 OR #281 OR #282 OR #283 OR #284 OR #285 OR #286 OR #287 OR #288 OR #289 OR #290 OR #291 OR #292 OR #293 OR #294 | 118085<br>2 |
| #294   | Search tripleblind*[Title/Abstract]                                                                                                                                  | 3           |
| #293   | Search trebleblind*[Title/Abstract]                                                                                                                                  | 0           |
| #292   | Search doubleblind*[Title/Abstract]                                                                                                                                  | 226         |
| #291   | Search singleblind*[Title/Abstract]                                                                                                                                  | 14          |
| #290   | Search blind*[Title/Abstract]                                                                                                                                        | 264508      |
| #289   | Search random*[Title/Abstract]                                                                                                                                       | 966357      |
| #288   | Search "Double-Blind Method"[Mesh]                                                                                                                                   | 144854      |
| #287   | Search "Single-Blind Method"[Mesh]                                                                                                                                   | 24869       |
| #286   | Search "Pragmatic Clinical Trials as Topic"[Publication Type]                                                                                                        | 0           |
| #285   | Search "Randomized Controlled Trials"[Publication Type]                                                                                                              | 0           |
| #284   | Search "Controlled Clinical Trials"[Publication Type]                                                                                                                | 0           |
| #283   | Search "Clinical Trials, Phase IV"[Publication Type]                                                                                                                 | 0           |
| #282   | Search "Clinical Trials, Phase III"[Publication Type]                                                                                                                | 0           |
| #281   | Search "Clinical Trials, Phase II"[Publication Type]                                                                                                                 | 0           |
| #280   | Search "Pragmatic Clinical Trials as Topic"[Mesh]                                                                                                                    | 182         |
| #279   | Search "Intention to Treat Analysis"[Mesh]                                                                                                                           | 1983        |
| #278   | Search "Randomized Controlled Trials as Topic"[Mesh]                                                                                                                 | 117082      |
| #277   | Search "Controlled Clinical Trials as Topic"[Mesh]                                                                                                                   | 121911      |
| #276   | Search "Clinical Trials, Phase IV as Topic"[Mesh]                                                                                                                    | 261         |
| #275   | Search "Clinical Trials, Phase III as Topic"[Mesh]                                                                                                                   | 8141        |
| #274   | Search "Clinical Trials, Phase II as Topic"[Mesh]                                                                                                                    | 6976        |
| #273   | #252 OR #253 OR #254 OR #255 OR #256 OR #257 OR #258 OR #259 OR #260 OR #261 OR #262 OR #263 OR #264 OR                                                              | 51476       |

---

|      |                                                                         |       |
|------|-------------------------------------------------------------------------|-------|
|      | #265 OR #266 OR #267 OR #268 OR #269 OR #270 OR #271<br>OR #272 OR #273 |       |
| #272 | Search "Cyclophosphamide"[Mesh]                                         | 51044 |
| #271 | Search "Cytosan"[Title/Abstract]                                        | 710   |
| #270 | Search "B518"[Title/Abstract]                                           | 5     |
| #269 | Search "B 518"[Title/Abstract]                                          | 11    |
| #268 | Search "B-518"[Title/Abstract]                                          | 11    |
| #267 | Search "Sendoxan"[Title/Abstract]                                       | 3     |
| #266 | Search "Procytox"[Title/Abstract]                                       | 2     |
| #265 | Search "NSC26271"[Title/Abstract]                                       | 1     |
| #264 | Search "NSC 26271"[Title/Abstract]                                      | 98    |
| #263 | Search "NSC-26271"[Title/Abstract]                                      | 98    |
| #262 | Search "Neosar"[Title/Abstract]                                         | 23    |
| #261 | Search "Endoxan"[Title/Abstract]                                        | 465   |
| #260 | Search "Cytosphan"[Title/Abstract]                                      | 0     |
| #259 | Search "Cyclophosphamide, (S)-Isomer"[Title/Abstract]                   | 0     |
| #258 | Search "Cyclophosphamide, (R)-Isomer"[Title/Abstract]                   | 0     |
| #257 | Search "Anhydrous, Cyclophosphamide"[Title/Abstract]                    | 0     |
| #256 | Search "Cyclophosphamide Anhydrous"[Title/Abstract]                     | 1     |
| #255 | Search "Cyclophosphane"[Title/Abstract]                                 | 234   |
| #254 | Search "Monohydrate, Cyclophosphamide"[Title/Abstract]                  | 0     |
| #253 | Search "Cyclophosphamide Monohydrate"[Title/Abstract]                   | 18    |
| #252 | Search "Cytosphane"[Title/Abstract]                                     | 0     |
| #251 | #242 OR #243 OR #244 OR #245 OR #246 OR #247 OR #248<br>OR #249 OR #250 | 3277  |
| #250 | Search "Natulan"[Title/Abstract]                                        | 110   |
| #249 | Search "Matulane"[Title/Abstract]                                       | 7     |
| #248 | Search "Monohydrochloride, Procarbazine"[Title/Abstract]                | 0     |
| #247 | Search "Procarbazine Monohydrochloride"[Title/Abstract]                 | 0     |
| #246 | Search "Hydrochloride, Procarbazine"[Title/Abstract]                    | 0     |
| #245 | Search "Procarbazine Hydrochloride"[Title/Abstract]                     | 72    |

---

---

|      |                                                                                                                                                                                                                                                                                  |       |
|------|----------------------------------------------------------------------------------------------------------------------------------------------------------------------------------------------------------------------------------------------------------------------------------|-------|
| #244 | Search "Monohydrobromide, Procarbazine"[Title/Abstract]                                                                                                                                                                                                                          | 0     |
| #243 | Search "Procarbazine Monohydrobromide"[Title/Abstract]                                                                                                                                                                                                                           | 0     |
| #242 | Search "Procarbazine"[Mesh]                                                                                                                                                                                                                                                      | 3195  |
| #241 | #208 OR #209 OR #210 OR #211 OR #212 OR #213 OR #214<br>OR #215 OR #216 OR #217 OR #218 OR #219 OR #220 OR<br>#221 OR #222 OR #223 OR #224 OR #225 OR #226 OR #227<br>OR #228 OR #229 OR #230 OR #231 OR #232 OR #233 OR<br>#234 OR #235 OR #236 OR #237 OR #238 OR #239 OR #240 | 37726 |
| #240 | Search "Prednison Galen"[Title/Abstract]                                                                                                                                                                                                                                         | 0     |
| #239 | Search "Sone"[Title/Abstract]                                                                                                                                                                                                                                                    | 79    |
| #238 | Search "Pronisone"[Title/Abstract]                                                                                                                                                                                                                                               | 9     |
| #237 | Search "Acasis, Prednison"[Title/Abstract]                                                                                                                                                                                                                                       | 0     |
| #236 | Search "Prednison Acasis"[Title/Abstract]                                                                                                                                                                                                                                        | 0     |
| #235 | Search "Predniment"[Title/Abstract]                                                                                                                                                                                                                                              | 0     |
| #234 | Search "Prednidib"[Title/Abstract]                                                                                                                                                                                                                                               | 0     |
| #233 | Search "Predni Tablinen"[Title/Abstract]                                                                                                                                                                                                                                         | 0     |
| #232 | Search "Panasol"[Title/Abstract]                                                                                                                                                                                                                                                 | 1     |
| #231 | Search "Orasone"[Title/Abstract]                                                                                                                                                                                                                                                 | 0     |
| #230 | Search "Meticorten"[Title/Abstract]                                                                                                                                                                                                                                              | 56    |
| #229 | Search "Liquid Pred"[Title/Abstract]                                                                                                                                                                                                                                             | 0     |
| #228 | Search "Kortancyl"[Title/Abstract]                                                                                                                                                                                                                                               | 0     |
| #227 | Search "Enkortolon"[Title/Abstract]                                                                                                                                                                                                                                              | 0     |
| #226 | Search "Encorton"[Title/Abstract]                                                                                                                                                                                                                                                | 66    |
| #225 | Search "Encortone"[Title/Abstract]                                                                                                                                                                                                                                               | 11    |
| #224 | Search "Deltasone"[Title/Abstract]                                                                                                                                                                                                                                               | 4     |
| #223 | Search "Decortisyl"[Title/Abstract]                                                                                                                                                                                                                                              | 0     |
| #222 | Search "Dacortin"[Title/Abstract]                                                                                                                                                                                                                                                | 10    |
| #221 | Search "Decortin"[Title/Abstract]                                                                                                                                                                                                                                                | 33    |
| #220 | Search "Cutason"[Title/Abstract]                                                                                                                                                                                                                                                 | 0     |
| #219 | Search "Panafcort"[Title/Abstract]                                                                                                                                                                                                                                               | 0     |
| #218 | Search "Cortancyl"[Title/Abstract]                                                                                                                                                                                                                                               | 24    |
| #217 | Search "Cortan"[Title/Abstract]                                                                                                                                                                                                                                                  | 0     |

---

---

|      |                                                                                                                                                                                                                                                                                                             |       |
|------|-------------------------------------------------------------------------------------------------------------------------------------------------------------------------------------------------------------------------------------------------------------------------------------------------------------|-------|
| #216 | Search "Apo-Prednisone"[Title/Abstract]                                                                                                                                                                                                                                                                     | 0     |
| #215 | Search "Winpred"[Title/Abstract]                                                                                                                                                                                                                                                                            | 0     |
| #214 | Search "Ultracorten"[Title/Abstract]                                                                                                                                                                                                                                                                        | 12    |
| #213 | Search "Sterapred"[Title/Abstract]                                                                                                                                                                                                                                                                          | 0     |
| #212 | Search "Prednison Hexal"[Title/Abstract]                                                                                                                                                                                                                                                                    | 0     |
| #211 | Search "Rectodelt"[Title/Abstract]                                                                                                                                                                                                                                                                          | 1     |
| #210 | Search "delta-Cortisone"[Title/Abstract]                                                                                                                                                                                                                                                                    | 102   |
| #209 | Search "Dehydrocortisone"[Title/Abstract]                                                                                                                                                                                                                                                                   | 30    |
| #208 | Search "Prednisone"[Mesh]                                                                                                                                                                                                                                                                                   | 37581 |
| #207 | #202 OR #203 OR #204 OR #205 OR #206                                                                                                                                                                                                                                                                        | 409   |
| #206 | Search "SGN-35"[Title/Abstract]                                                                                                                                                                                                                                                                             | 41    |
| #205 | Search "Adcetris"[Title/Abstract]                                                                                                                                                                                                                                                                           | 56    |
| #204 | Search "cAC10-vcMMAE"[Title/Abstract]                                                                                                                                                                                                                                                                       | 4     |
| #203 | Search "CAC10-1006"[Title/Abstract]                                                                                                                                                                                                                                                                         | 0     |
| #202 | Search "brentuximab vedotin" [Supplementary Concept]                                                                                                                                                                                                                                                        | 363   |
| #201 | #165 OR #166 OR #167 OR #168 OR #169 OR #170 OR #171<br>OR #172 OR #173 OR #174 OR #175 OR #176 OR #177 OR<br>#178 OR #179 OR #180 OR #181 OR #182 OR #183 OR #184<br>OR #185 OR #186 OR #187 OR #188 OR #189 OR #190 OR<br>#191 OR #192 OR #193 OR #194 OR #195 OR #196 OR #197<br>OR #198 OR #199 OR #200 | 18727 |
| #200 | Search "Etoposide, (5a alpha)-Isomer"[Title/Abstract]                                                                                                                                                                                                                                                       | 0     |
| #199 | Search "Etoposide Pierre Fabre"[Title/Abstract]                                                                                                                                                                                                                                                             | 0     |
| #198 | Search "Eto GRY"[Title/Abstract]                                                                                                                                                                                                                                                                            | 0     |
| #197 | Search "Eto-GRY"[Title/Abstract]                                                                                                                                                                                                                                                                            | 0     |
| #196 | Search "Etomedac"[Title/Abstract]                                                                                                                                                                                                                                                                           | 0     |
| #195 | Search "Eposin"[Title/Abstract]                                                                                                                                                                                                                                                                             | 0     |
| #194 | Search "Celltop"[Title/Abstract]                                                                                                                                                                                                                                                                            | 1     |
| #193 | Search "Vépéside Sandoz"[Title/Abstract]                                                                                                                                                                                                                                                                    | 1     |
| #192 | Search "Vépéside-Sandoz"[Title/Abstract]                                                                                                                                                                                                                                                                    | 1     |
| #191 | Search "VP16"[Title/Abstract]                                                                                                                                                                                                                                                                               | 2394  |
| #190 | Search "VP 16"[Title/Abstract]                                                                                                                                                                                                                                                                              | 2643  |

---

---

|      |                                                                                                                                            |       |
|------|--------------------------------------------------------------------------------------------------------------------------------------------|-------|
| #189 | Search "VP-16"[Title/Abstract]                                                                                                             | 2643  |
| #188 | Search "VP 16213"[Title/Abstract]                                                                                                          | 11    |
| #187 | Search "VP 16 213"[Title/Abstract]                                                                                                         | 345   |
| #186 | Search "VP 16-213"[Title/Abstract]                                                                                                         | 345   |
| #185 | Search "Vepesid"[Title/Abstract]                                                                                                           | 86    |
| #184 | Search "Teva, Etoposide"[Title/Abstract]                                                                                                   | 0     |
| #183 | Search "Etoposide Teva"[Title/Abstract]                                                                                                    | 0     |
| #182 | Search "Toposar"[Title/Abstract]                                                                                                           | 0     |
| #181 | Search "Riboposid"[Title/Abstract]                                                                                                         | 0     |
| #180 | Search "Onkoposid"[Title/Abstract]                                                                                                         | 0     |
| #179 | Search "NSC141540"[Title/Abstract]                                                                                                         | 0     |
| #178 | Search "NSC 141540"[Title/Abstract]                                                                                                        | 19    |
| #177 | Search "NSC-141540"[Title/Abstract]                                                                                                        | 19    |
| #176 | Search "Lastet"[Title/Abstract]                                                                                                            | 6     |
| #175 | Search "Exitop"[Title/Abstract]                                                                                                            | 0     |
| #174 | Search "Etoposido Ferrer Farma"[Title/Abstract]                                                                                            | 0     |
| #173 | Search "alpha-D-Glucopyranosyl Isomer<br>Etoposide"[Title/Abstract]                                                                        | 0     |
| #172 | Search "Etoposide, alpha D Glucopyranosyl<br>Isomer"[Title/Abstract]                                                                       | 0     |
| #171 | Search "Etoposide, alpha-D-Glucopyranosyl<br>Isomer"[Title/Abstract]                                                                       | 0     |
| #170 | Search "Etoposide, (5S)-Isomer"[Title/Abstract]                                                                                            | 0     |
| #169 | Search "Etoposide, (5a alpha,9 alpha)-Isomer"[Title/Abstract]                                                                              | 0     |
| #168 | Search "Etopos"[Title/Abstract]                                                                                                            | 0     |
| #167 | Search "Eposide"[Title/Abstract]                                                                                                           | 3     |
| #166 | Search "Demethyl Epipodophyllotoxin Ethylidine<br>Glucoside"[Title/Abstract]                                                               | 0     |
| #165 | Search "Etoposide"[Mesh]                                                                                                                   | 15844 |
| #164 | #147 OR #148 OR #149 OR #150 OR #151 OR #152 OR #153<br>OR #154 OR #155 OR #156 OR #157 OR #158 OR #159 OR<br>#160 OR #161 OR #162 OR #163 | 22391 |
| #163 | Search "Vincrisul"[Title/Abstract]                                                                                                         | 1     |
| #162 | Search "Vintec"[Title/Abstract]                                                                                                            | 1     |

---

---

|      |                                                                                                                                                                                                                                                                          |       |
|------|--------------------------------------------------------------------------------------------------------------------------------------------------------------------------------------------------------------------------------------------------------------------------|-------|
| #161 | Search "Vincristin Bristol"[Title/Abstract]                                                                                                                                                                                                                              | 0     |
| #160 | Search "PFS, Vincasar"[Title/Abstract]                                                                                                                                                                                                                                   | 0     |
| #159 | Search "Vincasar PFS"[Title/Abstract]                                                                                                                                                                                                                                    | 0     |
| #158 | Search "Farmistin"[Title/Abstract]                                                                                                                                                                                                                                       | 0     |
| #157 | Search "Vincasar"[Title/Abstract]                                                                                                                                                                                                                                        | 0     |
| #156 | Search "Onkocristin"[Title/Abstract]                                                                                                                                                                                                                                     | 0     |
| #155 | Search "Oncovine"[Title/Abstract]                                                                                                                                                                                                                                        | 18    |
| #154 | Search "Oncovin"[Title/Abstract]                                                                                                                                                                                                                                         | 411   |
| #153 | Search "Vincristin medac"[Title/Abstract]                                                                                                                                                                                                                                | 0     |
| #152 | Search "Citomid"[Title/Abstract]                                                                                                                                                                                                                                         | 0     |
| #151 | Search "cellcristin"[Title/Abstract]                                                                                                                                                                                                                                     | 0     |
| #150 | Search "Sulfate, Vincristine"[Title/Abstract]                                                                                                                                                                                                                            | 0     |
| #149 | Search "Vincristine Sulfate"[Title/Abstract]                                                                                                                                                                                                                             | 452   |
| #148 | Search "Leurocristine"[Title/Abstract]                                                                                                                                                                                                                                   | 13    |
| #147 | Search "Vincristine"[Mesh]                                                                                                                                                                                                                                               | 22093 |
| #146 | #114 OR #115 OR #116 OR #117 OR #118 OR #119 OR #120<br>OR #121 OR #122 OR #123 OR #124 OR #125 OR #126 OR<br>#127 OR #128 OR #129 OR #130 OR #131 OR #132 OR #133<br>OR #134 OR #135 OR #136 OR #137 OR #138 OR #139 OR<br>#140 OR #141 OR #142 OR #143 OR #144 OR #145 | 7001  |
| #145 | Search "Nitrogen Mustard N Oxide"[Title]                                                                                                                                                                                                                                 | 49    |
| #144 | Search "N-Oxide, Nitrogen Mustard"[Title/Abstract]                                                                                                                                                                                                                       | 0     |
| #143 | Search "Nitrogen Mustard N-Oxide"[Title/Abstract]                                                                                                                                                                                                                        | 58    |
| #142 | Search "Mechlorethamine N Oxide"[Title/Abstract]                                                                                                                                                                                                                         | 2     |
| #141 | Search "Mechlorethamine N-Oxide"[Title/Abstract]                                                                                                                                                                                                                         | 2     |
| #140 | Search "Caryolysine"[Title/Abstract]                                                                                                                                                                                                                                     | 10    |
| #139 | Search "NSC10107"[Title/Abstract]                                                                                                                                                                                                                                        | 0     |
| #138 | Search "NSC 10107"[Title/Abstract]                                                                                                                                                                                                                                       | 0     |
| #137 | Search "NSC-10107"[Title/Abstract]                                                                                                                                                                                                                                       | 0     |
| #136 | Search "Nitromin"[Title/Abstract]                                                                                                                                                                                                                                        | 74    |
| #135 | Search "Nitrogranulogen"[Title/Abstract]                                                                                                                                                                                                                                 | 61    |
| #134 | Search "Mustargen"[Title/Abstract]                                                                                                                                                                                                                                       | 28    |

---

---

|      |                                                                                                                                         |       |
|------|-----------------------------------------------------------------------------------------------------------------------------------------|-------|
| #133 | Search "Mitomen"[Title/Abstract]                                                                                                        | 16    |
| #132 | Search "Mechlorethamine Oxide"[Title/Abstract]                                                                                          | 47    |
| #131 | Search "NSC762"[Title/Abstract]                                                                                                         | 0     |
| #130 | Search "NSC 762"[Title/Abstract]                                                                                                        | 11    |
| #129 | Search "NSC-762"[Title/Abstract]                                                                                                        | 11    |
| #128 | Search "N-Oxide, Mechlorethamine Hydrochloride"[Title/Abstract]                                                                         | 0     |
| #127 | Search "Mechlorethamine Hydrochloride N Oxide"[Title/Abstract]                                                                          | 0     |
| #126 | Search "Hydrochloride N-Oxide, Mechlorethamine"[Title/Abstract]                                                                         | 0     |
| #125 | Search "Mechlorethamine Hydrochloride N-Oxide"[Title/Abstract]                                                                          | 0     |
| #124 | Search "Hydrochloride, Mechlorethamine"[Title/Abstract]                                                                                 | 0     |
| #123 | Search "Mechlorethamine Hydrochloride"[Title/Abstract]                                                                                  | 75    |
| #122 | Search "Embichin"[Title/Abstract]                                                                                                       | 27    |
| #121 | Search "Cloramin"[Title/Abstract]                                                                                                       | 1     |
| #120 | Search "Methylchlorethamine"[Title/Abstract]                                                                                            | 1     |
| #119 | Search "Chlorethazine"[Title/Abstract]                                                                                                  | 0     |
| #118 | Search "Nitrogen Mustard"[Title/Abstract]                                                                                               | 3325  |
| #117 | Search "Mustine"[Title/Abstract]                                                                                                        | 111   |
| #116 | Search "Bis(2-chloroethyl)methylamine"[Title/Abstract]                                                                                  | 26    |
| #115 | Search "Chlormethine"[Title/Abstract]                                                                                                   | 39    |
| #114 | Search "Mechlorethamine"[Mesh]                                                                                                          | 5523  |
| #113 | #95 OR #96 OR #97 OR #98 OR #99 OR #100 OR #101 OR #102 OR #103 OR #104 OR #105 OR #106 OR #107 OR #108 OR #109 OR #110 OR #111 OR #112 | 14457 |
| #112 | Search "Deticene"[Title/Abstract]                                                                                                       | 9     |
| #111 | Search "Biocarbazine"[Title/Abstract]                                                                                                   | 5     |
| #110 | Search "DTICDome"[Title/Abstract]                                                                                                       | 0     |
| #109 | Search "DTIC Dome"[Title/Abstract]                                                                                                      | 7     |
| #108 | Search "DTIC-Dome"[Title/Abstract]                                                                                                      | 7     |
| #107 | Search "NSC45388"[Title/Abstract]                                                                                                       | 0     |
| #106 | Search "NSC 45388"[Title/Abstract]                                                                                                      | 72    |

---

---

|      |                                                                                                                                   |       |
|------|-----------------------------------------------------------------------------------------------------------------------------------|-------|
| #105 | Search "NSC-45388"[Title/Abstract]                                                                                                | 72    |
| #104 | Search "Dimethyl Triazeno Imidazole Carboxamide"[Title/Abstract]                                                                  | 41    |
| #103 | Search "DIC"[Title/Abstract]                                                                                                      | 7323  |
| #102 | Search "5-(3,3-Dimethyl-1-triazeno)imidazole-4-carboxamide"[Title/Abstract]                                                       | 109   |
| #101 | Search "Decarbazine"[Title/Abstract]                                                                                              | 51    |
| #100 | Search "ICDT"[Title/Abstract]                                                                                                     | 6     |
| #99  | Search "DTIC"[Title/Abstract]                                                                                                     | 1082  |
| #98  | Search "Imidazole Carboxamide, Dimethyl"[Title/Abstract]                                                                          | 0     |
| #97  | Search "Carboxamide, Dimethyl Imidazole"[Title/Abstract]                                                                          | 0     |
| #96  | Search "Dimethyl Imidazole Carboxamide"[Title/Abstract]                                                                           | 1     |
| #95  | Search "Dacarbazine"[Mesh]                                                                                                        | 6775  |
| #94  | #83 OR #84 OR #85 OR #86 OR #87 OR #88 OR #89 OR #90 OR #91 OR #92 OR #93                                                         | 12436 |
| #93  | Search "Vinblastin Hexal"[Title/Abstract]                                                                                         | 0     |
| #92  | Search "Cellblastin"[Title/Abstract]                                                                                              | 0     |
| #91  | Search "Vinblastinsulfat-Gry"[Title/Abstract]                                                                                     | 0     |
| #90  | Search "Sulfate, Vinblastine"[Title/Abstract]                                                                                     | 0     |
| #89  | Search "Vinblastine Sulfate"[Title/Abstract]                                                                                      | 301   |
| #88  | Search "Velbe"[Title/Abstract]                                                                                                    | 37    |
| #87  | Search "Vinblastina Lilly"[Title/Abstract]                                                                                        | 0     |
| #86  | Search "Velban"[Title/Abstract]                                                                                                   | 46    |
| #85  | Search "Lemblastine"[Title/Abstract]                                                                                              | 0     |
| #84  | Search "Vincalukoblastine"[Title/Abstract]                                                                                        | 77    |
| #83  | Search "Vinblastine"[Mesh]                                                                                                        | 12319 |
| #82  | #63 OR #64 OR #65 OR #66 OR #67 OR #68 OR #69 OR #70 OR #71 OR #72 OR #73 OR #74 OR #75 OR #76 OR #77 OR #78 OR #79 OR #80 OR #81 | 14542 |
| #81  | Search "Bleomicina"[Title/Abstract]                                                                                               | 5     |
| #80  | Search "Blanoxan"[Title/Abstract]                                                                                                 | 0     |
| #79  | Search "Blenoxane"[Title/Abstract]                                                                                                | 21    |

---



---

|     |                                                                                                                                                                                                    |       |
|-----|----------------------------------------------------------------------------------------------------------------------------------------------------------------------------------------------------|-------|
| #78 | Search "Mack, Bleomycinum"[Title/Abstract]                                                                                                                                                         | 0     |
| #77 | Search "Bleomycinum Mack"[Title/Abstract]                                                                                                                                                          | 1     |
| #76 | Search "Sulfate, Bleomycin"[Title/Abstract]                                                                                                                                                        | 0     |
| #75 | Search "Bleomycin Sulfate"[Title/Abstract]                                                                                                                                                         | 120   |
| #74 | Search "Bleomycin B(2)"[Title/Abstract]                                                                                                                                                            | 2     |
| #73 | Search "Bleomycin B2"[Title/Abstract]                                                                                                                                                              | 21    |
| #72 | Search "Bleomycin A(2)"[Title/Abstract]                                                                                                                                                            | 8     |
| #71 | Search "Bleomycin A2"[Title/Abstract]                                                                                                                                                              | 141   |
| #70 | Search "Bellon, Bléomycine"[Title/Abstract]                                                                                                                                                        | 0     |
| #69 | Search "Bléomycine Bellon"[Title/Abstract]                                                                                                                                                         | 0     |
| #68 | Search "Bleolem"[Title/Abstract]                                                                                                                                                                   | 0     |
| #67 | Search "BLEOcell"[Title/Abstract]                                                                                                                                                                  | 0     |
| #66 | Search "BLEO cell"[Title/Abstract]                                                                                                                                                                 | 0     |
| #65 | Search "BLEO-cell"[Title/Abstract]                                                                                                                                                                 | 0     |
| #64 | Search "Bleomycins"[Title/Abstract]                                                                                                                                                                | 149   |
| #63 | Search "Bleomycin"[Mesh]                                                                                                                                                                           | 14488 |
| #62 | #35 OR #36 OR #37 OR #38 OR #39 OR #40 OR #41 OR #42<br>OR #43 OR #44 OR #45 OR #46 OR #47 OR #48 OR #49 OR<br>#50 OR #51 OR #52 OR #53 OR #54 OR #55 OR #56 OR #57<br>OR #58 OR #59 OR #60 OR #61 | 55916 |
| #61 | Search "Onkodox"[Title/Abstract]                                                                                                                                                                   | 0     |
| #60 | Search "Myocet"[Title/Abstract]                                                                                                                                                                    | 58    |
| #59 | Search "Doxotec"[Title/Abstract]                                                                                                                                                                   | 0     |
| #58 | Search "Doxorubicine Baxter"[Title/Abstract]                                                                                                                                                       | 0     |
| #57 | Search "Doxorubicina Tedec"[Title/Abstract]                                                                                                                                                        | 0     |
| #56 | Search "Doxorubicina Funk"[Title/Abstract]                                                                                                                                                         | 0     |
| #55 | Search "Doxorubicina Ferrer Farm"[Title/Abstract]                                                                                                                                                  | 0     |
| #54 | Search "Doxorubicin NC"[Title/Abstract]                                                                                                                                                            | 0     |
| #53 | Search "Hydrochloride, Doxorubicin"[Title/Abstract]                                                                                                                                                | 0     |
| #52 | Search "Doxorubicin Hydrochloride"[Title/Abstract]                                                                                                                                                 | 871   |
| #51 | Search "Doxorubicin Hexal"[Title/Abstract]                                                                                                                                                         | 0     |

---

---

|     |                                                                                                                                                                                                                                        |       |
|-----|----------------------------------------------------------------------------------------------------------------------------------------------------------------------------------------------------------------------------------------|-------|
| #50 | Search "Doxolem"[Title/Abstract]                                                                                                                                                                                                       | 0     |
| #49 | Search "Urokit Doxo cell"[Title/Abstract]                                                                                                                                                                                              | 0     |
| #48 | Search "Urokit Doxo-cell"[Title/Abstract]                                                                                                                                                                                              | 0     |
| #47 | Search "DOXO cell"[Title/Abstract]                                                                                                                                                                                                     | 2     |
| #46 | Search "DOXO-cell"[Title/Abstract]                                                                                                                                                                                                     | 2     |
| #45 | Search "Adrimedac"[Title/Abstract]                                                                                                                                                                                                     | 0     |
| #44 | Search "Adriablastin"[Title/Abstract]                                                                                                                                                                                                  | 51    |
| #43 | Search "Adriablastine"[Title/Abstract]                                                                                                                                                                                                 | 19    |
| #42 | Search "Adriblastina"[Title/Abstract]                                                                                                                                                                                                  | 19    |
| #41 | Search "Adriblastine"[Title/Abstract]                                                                                                                                                                                                  | 23    |
| #40 | Search "Adriblastin"[Title/Abstract]                                                                                                                                                                                                   | 58    |
| #39 | Search "Adriamycin"[Title/Abstract]                                                                                                                                                                                                    | 15152 |
| #38 | Search "Rubex"[Title/Abstract]                                                                                                                                                                                                         | 3     |
| #37 | Search "Ribodoxo"[Title/Abstract]                                                                                                                                                                                                      | 0     |
| #36 | Search "Farmiblastina"[Title/Abstract]                                                                                                                                                                                                 | 0     |
| #35 | Search "Doxorubicin"[Mesh]                                                                                                                                                                                                             | 50814 |
| #34 | #1 OR #2 OR #3 OR #4 OR #5 OR #6 OR #7 OR #8 OR #9<br>OR #10 OR #11 OR #12 OR #13 OR #14 OR #15 OR #16 OR<br>#17 OR #18 OR #19 OR #20 OR #21 OR #22 OR #23 OR #24<br>OR #25 OR #26 OR #27 OR #28 OR #29 OR #30 OR #31 OR<br>#32 OR #33 | 64036 |
| #33 | Search "Lymphocyte Depletion Hodgkin's<br>Lymphoma"[Title/Abstract]                                                                                                                                                                    | 1     |
| #32 | Search "Adult Hodgkin Lymphoma"[Title/Abstract]                                                                                                                                                                                        | 22    |
| #31 | Search "Hodgkin Lymphoma, Adult"[Title/Abstract]                                                                                                                                                                                       | 0     |
| #30 | Search "Mixed Cellularity Hodgkin's<br>Lymphoma"[Title/Abstract]                                                                                                                                                                       | 12    |
| #29 | Search "Lymphocyte Rich Classical Hodgkin's<br>Lymphoma"[Title/Abstract]                                                                                                                                                               | 11    |
| #28 | Search "Lymphocyte-Rich Classical Hodgkin's<br>Lymphoma"[Title/Abstract]                                                                                                                                                               | 11    |
| #27 | Search "Nodular Sclerosing Hodgkin's<br>Lymphoma"[Title/Abstract]                                                                                                                                                                      | 27    |
| #26 | Search "Nodular Lymphocyte Predominant Hodgkin's<br>Lymphoma"[Title/Abstract]                                                                                                                                                          | 55    |

---

---

|     |                                                                            |       |
|-----|----------------------------------------------------------------------------|-------|
| #25 | Search "Nodular Lymphocyte-Predominant Hodgkin's Lymphoma"[Title/Abstract] | 55    |
| #24 | Search "Malignant Granulomas"[Title/Abstract]                              | 8     |
| #23 | Search "Malignant Granuloma"[Title/Abstract]                               | 248   |
| #22 | Search "Granuloma, Malignant"[Title/Abstract]                              | 0     |
| #21 | Search "Hodgkin Granuloma"[Title/Abstract]                                 | 1     |
| #20 | Search "Granuloma, Hodgkin"[Title/Abstract]                                | 0     |
| #19 | Search "Disease, Hodgkins"[Title/Abstract]                                 | 0     |
| #18 | Search "Hodgkins Disease"[Title/Abstract]                                  | 214   |
| #17 | Search "Lymphoma, Hodgkin's"[Title/Abstract]                               | 1     |
| #16 | Search "Hodgkins Lymphoma"[Title/Abstract]                                 | 477   |
| #15 | Search "Hodgkin's Lymphoma"[Title/Abstract]                                | 22190 |
| #14 | Search "Disease, Hodgkin's"[Title/Abstract]                                | 0     |
| #13 | Search "Hodgkin's Disease"[Title/Abstract]                                 | 19651 |
| #12 | Search "Lymphoma, Hodgkin"[Title/Abstract]                                 | 0     |
| #11 | Search "Hodgkin Lymphoma"[Title/Abstract]                                  | 14310 |
| #10 | Search "Malignant Lymphogranulomas"[Title/Abstract]                        | 3     |
| #9  | Search "Malignant Lymphogranuloma"[Title/Abstract]                         | 231   |
| #8  | Search "Lymphogranulomas, Malignant"[Title/Abstract]                       | 0     |
| #7  | Search "Lymphogranuloma, Malignant"[Title/Abstract]                        | 0     |
| #6  | Search "Hodgkins Granuloma"[Title/Abstract]                                | 0     |
| #5  | Search "Granuloma, Hodgkins"[Title/Abstract]                               | 0     |
| #4  | Search "Hodgkin's Granuloma"[Title/Abstract]                               | 32    |
| #3  | Search "Disease, Hodgkin"[Title/Abstract]                                  | 0     |
| #2  | Search "Granuloma, Hodgkin's"[Title/Abstract]                              | 0     |
| #1  | Search "Hodgkin Disease"[Mesh]                                             | 32970 |

---

**Table S2** Source: EMBASE (Searched on: 3April 2018)

| No.  | Query                                                                                                                                                                                                                                                                                                                                                                                                                                                                                                                                                                                                                                                                                                                                                       | Results |
|------|-------------------------------------------------------------------------------------------------------------------------------------------------------------------------------------------------------------------------------------------------------------------------------------------------------------------------------------------------------------------------------------------------------------------------------------------------------------------------------------------------------------------------------------------------------------------------------------------------------------------------------------------------------------------------------------------------------------------------------------------------------------|---------|
| #475 | #17 AND #459 AND #474                                                                                                                                                                                                                                                                                                                                                                                                                                                                                                                                                                                                                                                                                                                                       | 1708    |
| #474 | #460 OR #461 OR #462 OR #463 OR #464 OR #465 OR #466<br>OR #467 OR #468 OR #469 OR #470 OR #471 OR #472 OR<br>#473                                                                                                                                                                                                                                                                                                                                                                                                                                                                                                                                                                                                                                          | 1582437 |
| #473 | 'double blind procedure'/exp                                                                                                                                                                                                                                                                                                                                                                                                                                                                                                                                                                                                                                                                                                                                | 147288  |
| #472 | 'single blind procedure'/exp                                                                                                                                                                                                                                                                                                                                                                                                                                                                                                                                                                                                                                                                                                                                | 30837   |
| #471 | 'randomized controlled trial (topic)/exp                                                                                                                                                                                                                                                                                                                                                                                                                                                                                                                                                                                                                                                                                                                    | 138957  |
| #470 | 'controlled clinical trial (topic)/exp                                                                                                                                                                                                                                                                                                                                                                                                                                                                                                                                                                                                                                                                                                                      | 144799  |
| #469 | 'phase 4 clinical trial (topic)/exp                                                                                                                                                                                                                                                                                                                                                                                                                                                                                                                                                                                                                                                                                                                         | 1345    |
| #468 | 'phase 2 clinical trial (topic)/exp                                                                                                                                                                                                                                                                                                                                                                                                                                                                                                                                                                                                                                                                                                                         | 30099   |
| #467 | 'phase 3 clinical trial (topic)/exp                                                                                                                                                                                                                                                                                                                                                                                                                                                                                                                                                                                                                                                                                                                         | 30513   |
| #466 | 'multicenter study (topic)/exp                                                                                                                                                                                                                                                                                                                                                                                                                                                                                                                                                                                                                                                                                                                              | 25776   |
| #465 | 'tripleblind*':ab,ti                                                                                                                                                                                                                                                                                                                                                                                                                                                                                                                                                                                                                                                                                                                                        | 7       |
| #464 | 'trebleblind*':ab,ti                                                                                                                                                                                                                                                                                                                                                                                                                                                                                                                                                                                                                                                                                                                                        | 0       |
| #463 | 'doubleblind*':ab,ti                                                                                                                                                                                                                                                                                                                                                                                                                                                                                                                                                                                                                                                                                                                                        | 2750    |
| #462 | 'singleblind*':ab,ti                                                                                                                                                                                                                                                                                                                                                                                                                                                                                                                                                                                                                                                                                                                                        | 223     |
| #461 | 'blind*':ab,ti                                                                                                                                                                                                                                                                                                                                                                                                                                                                                                                                                                                                                                                                                                                                              | 364863  |
| #460 | 'random*':ab,ti                                                                                                                                                                                                                                                                                                                                                                                                                                                                                                                                                                                                                                                                                                                                             | 1274000 |
| #459 | #83 OR #109 OR #126 OR #160 OR #231 OR #238 OR #276<br>OR #281 OR #310 OR #370 OR #458                                                                                                                                                                                                                                                                                                                                                                                                                                                                                                                                                                                                                                                                      | 846137  |
| #458 | #371 OR #372 OR #373 OR #374 OR #375 OR #376 OR #377<br>OR #378 OR #379 OR #380 OR #381 OR #382 OR #383 OR<br>#384 OR #385 OR #386 OR #387 OR #388 OR #389 OR #390<br>OR #391 OR #392 OR #393 OR #394 OR #395 OR #396 OR<br>#397 OR #398 OR #399 OR #400 OR #401 OR #402 OR #403<br>OR #404 OR #405 OR #406 OR #407 OR #408 OR #409 OR<br>#410 OR #411 OR #412 OR #413 OR #414 OR #415 OR #416<br>OR #417 OR #418 OR #419 OR #420 OR #421 OR #422 OR<br>#423 OR #424 OR #425 OR #426 OR #427 OR #428 OR #429<br>OR #430 OR #431 OR #432 OR #433 OR #434 OR #435 OR<br>#436 OR #437 OR #438 OR #439 OR #440 OR #441 OR #442<br>OR #443 OR #444 OR #445 OR #446 OR #447 OR #448 OR<br>#449 OR #450 OR #451 OR #452 OR #453 OR #454 OR #455<br>OR #456 OR #457 | 160637  |
| #457 | 'winpred':ab,ti                                                                                                                                                                                                                                                                                                                                                                                                                                                                                                                                                                                                                                                                                                                                             | 0       |
| #456 | 'urtilone':ab,ti                                                                                                                                                                                                                                                                                                                                                                                                                                                                                                                                                                                                                                                                                                                                            | 0       |
| #455 | 'ultracorten':ab,ti                                                                                                                                                                                                                                                                                                                                                                                                                                                                                                                                                                                                                                                                                                                                         | 10      |
| #454 | 'sterapred ds':ab,ti                                                                                                                                                                                                                                                                                                                                                                                                                                                                                                                                                                                                                                                                                                                                        | 0       |
| #453 | 'sterapred':ab,ti                                                                                                                                                                                                                                                                                                                                                                                                                                                                                                                                                                                                                                                                                                                                           | 0       |
| #452 | 'sterometz':ab,ti                                                                                                                                                                                                                                                                                                                                                                                                                                                                                                                                                                                                                                                                                                                                           | 0       |
| #451 | 'servisone':ab,ti                                                                                                                                                                                                                                                                                                                                                                                                                                                                                                                                                                                                                                                                                                                                           | 0       |

---

|      |                                                        |     |
|------|--------------------------------------------------------|-----|
| #450 | 'rectodelt':ab,ti                                      | 2   |
| #449 | 'rayos':ab,ti                                          | 28  |
| #448 | 'pulumison':ab,ti                                      | 0   |
| #447 | 'pronizone':ab,ti                                      | 0   |
| #446 | 'pronisone':ab,ti                                      | 12  |
| #445 | 'pronison':ab,ti                                       | 19  |
| #444 | 'pregna 1, 4 diene 3, 11, 20 trione 17, 21 diol':ab,ti | 0   |
| #443 | 'prednitone':ab,ti                                     | 0   |
| #442 | 'prednisone test':ab,ti                                | 15  |
| #441 | 'prednisone intensol':ab,ti                            | 1   |
| #440 | 'prednisone alcohol':ab,ti                             | 1   |
| #439 | 'prednison':ab,ti                                      | 249 |
| #438 | 'prednidib':ab,ti                                      | 0   |
| #437 | 'prednicot':ab,ti                                      | 0   |
| #436 | 'prednicorm':ab,ti                                     | 0   |
| #435 | 'prednicen-m':ab,ti                                    | 0   |
| #434 | 'precortal':ab,ti                                      | 0   |
| #433 | 'precort':ab,ti                                        | 0   |
| #432 | 'pehacort':ab,ti                                       | 0   |
| #431 | 'paracort':ab,ti                                       | 0   |
| #430 | 'panafcort':ab,ti                                      | 0   |
| #429 | 'orisane':ab,ti                                        | 0   |
| #428 | 'orasone':ab,ti                                        | 0   |
| #427 | 'nsc10023':ab,ti                                       | 0   |
| #426 | 'nsc 10023':ab,ti                                      | 15  |
| #425 | 'nisona':ab,ti                                         | 0   |
| #424 | 'meticortine':ab,ti                                    | 0   |
| #423 | 'meticorten':ab,ti                                     | 54  |
| #422 | 'metacortandracin':ab,ti                               | 72  |
| #421 | 'meprison':ab,ti                                       | 0   |
| #420 | 'me-korti':ab,ti                                       | 0   |
| #419 | 'lodotra':ab,ti                                        | 12  |
| #418 | 'liquid pred':ab,ti                                    | 0   |
| #417 | 'insone':ab,ti                                         | 0   |
| #416 | 'hostacortin':ab,ti                                    | 5   |
| #415 | 'fernisone':ab,ti                                      | 0   |
| #414 | 'enkorton':ab,ti                                       | 3   |
| #413 | 'encortone':ab,ti                                      | 12  |
| #412 | 'encorton':ab,ti                                       | 65  |
| #411 | 'drazone':ab,ti                                        | 1   |
| #410 | 'diadreson':ab,ti                                      | 0   |
| #409 | 'di-adreson':ab,ti                                     | 3   |
| #408 | 'di adreson':ab,ti                                     | 3   |
| #407 | 'deltra':ab,ti                                         | 1   |

---

---

|      |                                                                                                                                                                                                                                                                                                                                                                                                                                                      |        |
|------|------------------------------------------------------------------------------------------------------------------------------------------------------------------------------------------------------------------------------------------------------------------------------------------------------------------------------------------------------------------------------------------------------------------------------------------------------|--------|
| #406 | 'deltisona':ab,ti                                                                                                                                                                                                                                                                                                                                                                                                                                    | 1      |
| #405 | 'deltison':ab,ti                                                                                                                                                                                                                                                                                                                                                                                                                                     | 0      |
| #404 | 'deltasone':ab,ti                                                                                                                                                                                                                                                                                                                                                                                                                                    | 6      |
| #403 | 'deltacortone':ab,ti                                                                                                                                                                                                                                                                                                                                                                                                                                 | 2      |
| #402 | 'deltacortisone':ab,ti                                                                                                                                                                                                                                                                                                                                                                                                                               | 22     |
| #401 | 'deltacortene':ab,ti                                                                                                                                                                                                                                                                                                                                                                                                                                 | 10     |
| #400 | 'deltacorten':ab,ti                                                                                                                                                                                                                                                                                                                                                                                                                                  | 2      |
| #399 | 'delta-dome':ab,ti                                                                                                                                                                                                                                                                                                                                                                                                                                   | 0      |
| #398 | 'delta prenovis':ab,ti                                                                                                                                                                                                                                                                                                                                                                                                                               | 3      |
| #397 | 'delta e':ab,ti                                                                                                                                                                                                                                                                                                                                                                                                                                      | 229    |
| #396 | 'delta dome':ab,ti                                                                                                                                                                                                                                                                                                                                                                                                                                   | 0      |
| #395 | 'delta cortisone':ab,ti                                                                                                                                                                                                                                                                                                                                                                                                                              | 91     |
| #394 | 'delta cortelan':ab,ti                                                                                                                                                                                                                                                                                                                                                                                                                               | 0      |
| #393 | 'delta 1 dehydrocortisone':ab,ti                                                                                                                                                                                                                                                                                                                                                                                                                     | 12     |
| #392 | 'dellacort a':ab,ti                                                                                                                                                                                                                                                                                                                                                                                                                                  | 0      |
| #391 | 'delitison':ab,ti                                                                                                                                                                                                                                                                                                                                                                                                                                    | 0      |
| #390 | 'dekortin':ab,ti                                                                                                                                                                                                                                                                                                                                                                                                                                     | 0      |
| #389 | 'dehydrocortisone':ab,ti                                                                                                                                                                                                                                                                                                                                                                                                                             | 38     |
| #388 | 'decortisyl':ab,ti                                                                                                                                                                                                                                                                                                                                                                                                                                   | 0      |
| #387 | 'decortine':ab,ti                                                                                                                                                                                                                                                                                                                                                                                                                                    | 0      |
| #386 | 'decortin e merck':ab,ti                                                                                                                                                                                                                                                                                                                                                                                                                             | 0      |
| #385 | 'decortin':ab,ti                                                                                                                                                                                                                                                                                                                                                                                                                                     | 39     |
| #384 | 'decortancyl':ab,ti                                                                                                                                                                                                                                                                                                                                                                                                                                  | 0      |
| #383 | 'de cortisyl':ab,ti                                                                                                                                                                                                                                                                                                                                                                                                                                  | 0      |
| #382 | 'dacorten':ab,ti                                                                                                                                                                                                                                                                                                                                                                                                                                     | 0      |
| #381 | 'cutason':ab,ti                                                                                                                                                                                                                                                                                                                                                                                                                                      | 0      |
| #380 | 'cortiprex':ab,ti                                                                                                                                                                                                                                                                                                                                                                                                                                    | 0      |
| #379 | 'cortidelt':ab,ti                                                                                                                                                                                                                                                                                                                                                                                                                                    | 0      |
| #378 | 'cortan':ab,ti                                                                                                                                                                                                                                                                                                                                                                                                                                       | 0      |
| #377 | 'colisone':ab,ti                                                                                                                                                                                                                                                                                                                                                                                                                                     | 1      |
| #376 | 'biocortone':ab,ti                                                                                                                                                                                                                                                                                                                                                                                                                                   | 0      |
| #375 | 'apo-prednisone':ab,ti                                                                                                                                                                                                                                                                                                                                                                                                                               | 0      |
| #374 | 'ancortone':ab,ti                                                                                                                                                                                                                                                                                                                                                                                                                                    | 0      |
| #373 | '17, 21 dihydroxypregna 1, 4 diene 3, 11, 20 trione':ab,ti                                                                                                                                                                                                                                                                                                                                                                                           | 1      |
| #372 | '1, 2 dehydrocortisone':ab,ti                                                                                                                                                                                                                                                                                                                                                                                                                        | 3      |
| #371 | 'prednisone'/exp                                                                                                                                                                                                                                                                                                                                                                                                                                     | 160182 |
| #370 | #311 OR #312 OR #313 OR #314 OR #315 OR #316 OR #317<br>OR #318 OR #319 OR #320 OR #321 OR #322 OR #323 OR<br>#324 OR #325 OR #326 OR #327 OR #328 OR #329 OR #330<br>OR #331 OR #332 OR #333 OR #334 OR #335 OR #336 OR<br>#337 OR #338 OR #339 OR #340 OR #341 OR #342 OR #343<br>OR #344 OR #345 OR #346 OR #347 OR #348 OR #349 OR<br>#350 OR #351 OR #352 OR #353 OR #354 OR #355 OR #356<br>OR #357 OR #358 OR #359 OR #360 OR #361 OR #362 OR | 200206 |

---

---

| #363 OR #364 OR #365 OR #366 OR #367 OR #368 OR #369 |                                                                             |      |
|------------------------------------------------------|-----------------------------------------------------------------------------|------|
| #369                                                 | 'syklofosamid':ab,ti                                                        | 0    |
| #368                                                 | 'sendoxan':ab,ti                                                            | 4    |
| #367                                                 | 'semtoxan':ab,ti                                                            | 0    |
| #366                                                 | 'procytoxide':ab,ti                                                         | 3    |
| #365                                                 | 'procytox':ab,ti                                                            | 2    |
| #364                                                 | 'nsc 2671':ab,ti                                                            | 0    |
| #363                                                 | 'nsc 26271':ab,ti                                                           | 107  |
| #362                                                 | 'noristan':ab,ti                                                            | 7    |
| #361                                                 | 'neosar':ab,ti                                                              | 25   |
| #360                                                 | 'neosan':ab,ti                                                              | 0    |
| #359                                                 | 'n, n bis (2 chlorethyl) n o propylene phosphoric acid ester diamide':ab,ti | 0    |
| #358                                                 | 'mitoxan':ab,ti                                                             | 1    |
| #357                                                 | 'lyophilized cytoxan':ab,ti                                                 | 0    |
| #356                                                 | 'ledoxina':ab,ti                                                            | 0    |
| #355                                                 | 'ledoxan':ab,ti                                                             | 0    |
| #354                                                 | 'genoxal':ab,ti                                                             | 4    |
| #353                                                 | 'enduxan':ab,ti                                                             | 1    |
| #352                                                 | 'endoxon-asta':ab,ti                                                        | 0    |
| #351                                                 | 'endoxana':ab,ti                                                            | 3    |
| #350                                                 | 'endoxan-asta':ab,ti                                                        | 9    |
| #349                                                 | 'endoxan asta':ab,ti                                                        | 9    |
| #348                                                 | 'endoxan':ab,ti                                                             | 654  |
| #347                                                 | 'endocyclo phosphate':ab,ti                                                 | 0    |
| #346                                                 | 'cytoxan lyophilized':ab,ti                                                 | 0    |
| #345                                                 | 'cytoxan':ab,ti                                                             | 1179 |
| #344                                                 | 'cytophosphane':ab,ti                                                       | 2    |
| #343                                                 | 'cytophosphan':ab,ti                                                        | 1    |
| #342                                                 | 'cyphos':ab,ti                                                              | 17   |
| #341                                                 | 'cycloxan':ab,ti                                                            | 0    |
| #340                                                 | 'cyclostin n':ab,ti                                                         | 0    |
| #339                                                 | 'cyclostin':ab,ti                                                           | 1    |
| #338                                                 | 'cyclophosphane':ab,ti                                                      | 203  |
| #337                                                 | 'cyclophosphan':ab,ti                                                       | 83   |
| #336                                                 | 'cyclophosphamides':ab,ti                                                   | 50   |
| #335                                                 | 'cyclophosphamide isopac':ab,ti                                             | 0    |
| #334                                                 | 'cyclophosphamid':ab,ti                                                     | 308  |
| #333                                                 | 'cyclophar':ab,ti                                                           | 0    |
| #332                                                 | 'cyclofosfamide':ab,ti                                                      | 91   |
| #331                                                 | 'cyclofosamid':ab,ti                                                        | 4    |
| #330                                                 | 'cyclofos amide':ab,ti                                                      | 0    |
| #329                                                 | 'cycloblastine':ab,ti                                                       | 1    |
| #328                                                 | 'cycloblastin':ab,ti                                                        | 0    |

---

|      |                                                                                                                                                                                                                              |        |
|------|------------------------------------------------------------------------------------------------------------------------------------------------------------------------------------------------------------------------------|--------|
| #327 | 'cyclo-cell':ab,ti                                                                                                                                                                                                           | 0      |
| #326 | 'clafen':ab,ti                                                                                                                                                                                                               | 3      |
| #325 | 'cicloxal':ab,ti                                                                                                                                                                                                             | 0      |
| #324 | 'ciclolen':ab,ti                                                                                                                                                                                                             | 0      |
| #323 | 'ciclofosfamida':ab,ti                                                                                                                                                                                                       | 13     |
| #322 | 'carloxan':ab,ti                                                                                                                                                                                                             | 0      |
| #321 | 'b518 asta':ab,ti                                                                                                                                                                                                            | 0      |
| #320 | 'b518':ab,ti                                                                                                                                                                                                                 | 8      |
| #319 | 'b 518 asta':ab,ti                                                                                                                                                                                                           | 3      |
| #318 | 'b 518':ab,ti                                                                                                                                                                                                                | 11     |
| #317 | 'alkyroxan':ab,ti                                                                                                                                                                                                            | 0      |
| #316 | '2h 1, 3, 2 oxazaphosphorine 2 [bis (2 chloroethyl) amino] tetrahydro 2 oxide':ab,ti                                                                                                                                         | 0      |
| #315 | '2 [bis (2 chloroethyl) amino] (2h) 1, 3, 2 oxazaphosphorinane 2 oxide':ab,ti                                                                                                                                                | 0      |
| #314 | '2 [bis (2 chloroethyl) amino] 1 oxa 3 aza 2 phosphacyclohexane':ab,ti                                                                                                                                                       | 0      |
| #313 | '2 [bis (beta chlorethyl) amino] 1 oxa 3 aza 2 phosphacyclohexan 2 oxid':ab,ti                                                                                                                                               | 0      |
| #312 | '2 [bis (2 chloroethyl) amino] tetrahydro (2h) 1, 3, 2 oxazaphosphorine 2 oxide':ab,ti                                                                                                                                       | 9      |
| #311 | 'cyclophosphamide'/exp                                                                                                                                                                                                       | 199813 |
| #310 | #282 OR #283 OR #284 OR #285 OR #286 OR #287 OR #288 OR #289 OR #290 OR #291 OR #292 OR #293 OR #294 OR #295 OR #296 OR #297 OR #298 OR #299 OR #300 OR #301 OR #302 OR #303 OR #304 OR #305 OR #306 OR #307 OR #308 OR #309 | 16503  |
| #309 | 'ro 4 6467 1':ab,ti                                                                                                                                                                                                          | 1      |
| #308 | 'ro 4 6467':ab,ti                                                                                                                                                                                                            | 12     |
| #307 | 'procarbazine hydrochloride':ab,ti                                                                                                                                                                                           | 84     |
| #306 | 'procarbazin':ab,ti                                                                                                                                                                                                          | 24     |
| #305 | 'procarbazide':ab,ti                                                                                                                                                                                                         | 0      |
| #304 | 'nsc 77213':ab,ti                                                                                                                                                                                                            | 24     |
| #303 | 'natulan':ab,ti                                                                                                                                                                                                              | 126    |
| #302 | 'n isopropyl alpha (methylhydrazone) para toluamide':ab,ti                                                                                                                                                                   | 0      |
| #301 | 'n isopropyl alpha (methylhydrazino) para toluamide':ab,ti                                                                                                                                                                   | 0      |
| #300 | 'n isopropyl alpha (2 methylhydrazino) para toluamide':ab,ti                                                                                                                                                                 | 0      |
| #299 | 'n isopropyl alpha (2 methylhydrazino) p toluamide':ab,ti                                                                                                                                                                    | 11     |
| #298 | 'n isopropyl 1 (2 methylhydrazino) p toluamide':ab,ti                                                                                                                                                                        | 0      |
| #297 | 'mih':ab,ti                                                                                                                                                                                                                  | 689    |
| #296 | 'methylhydrazinomethylisopropylbenzamide':ab,ti                                                                                                                                                                              | 0      |
| #295 | 'matulane':ab,ti                                                                                                                                                                                                             | 11     |
| #294 | 'ibenzmethyzine':ab,ti                                                                                                                                                                                                       | 5      |
| #293 | 'ibenzmethyzin':ab,ti                                                                                                                                                                                                        | 10     |



---

|      |                                                                                                                                                                                                                                                                                                                     |       |
|------|---------------------------------------------------------------------------------------------------------------------------------------------------------------------------------------------------------------------------------------------------------------------------------------------------------------------|-------|
| #292 | 'ibenzmethycine':ab,ti                                                                                                                                                                                                                                                                                              | 0     |
| #291 | 'ibenzmethycin':ab,ti                                                                                                                                                                                                                                                                                               | 0     |
| #290 | 'ibenzmethizine':ab,ti                                                                                                                                                                                                                                                                                              | 0     |
| #289 | 'benzmethyzine':ab,ti                                                                                                                                                                                                                                                                                               | 0     |
| #288 | '1 methyl 2 para (isopropylcarbamyl) benzylhydrazine':ab,ti                                                                                                                                                                                                                                                         | 0     |
| #287 | '1 methyl 2 (para isopropylcarbamoylbenzyl) hydrazine':ab,ti                                                                                                                                                                                                                                                        | 0     |
| #286 | '1 methyl 2 (para isopropylcarbamoyl) benzylhydrazine':ab,ti                                                                                                                                                                                                                                                        | 0     |
| #285 | '1 methyl 2 (4 isopropylcarbamoylbenzyl) hydrazine':ab,ti                                                                                                                                                                                                                                                           | 0     |
| #284 | '1 methyl 2 (4 isopropyl carbamoylbenzyl) hydrazine':ab,ti                                                                                                                                                                                                                                                          | 0     |
| #283 | '1 (4 isopropylcarbamoylbenzyl) 2 methylhydrazine':ab,ti                                                                                                                                                                                                                                                            | 0     |
| #282 | 'procarbazine'/exp                                                                                                                                                                                                                                                                                                  | 15738 |
| #281 | #277 OR #278 OR #279 OR #280                                                                                                                                                                                                                                                                                        | 2437  |
| #280 | 'sgn35':ab,ti                                                                                                                                                                                                                                                                                                       | 15    |
| #279 | 'sgn 35':ab,ti                                                                                                                                                                                                                                                                                                      | 134   |
| #278 | 'adcetris':ab,ti                                                                                                                                                                                                                                                                                                    | 140   |
| #277 | 'brentuximab vedotin'/exp                                                                                                                                                                                                                                                                                           | 2396  |
| #276 | #239 OR #240 OR #241 OR #242 OR #243 OR #244 OR #245<br>OR #246 OR #247 OR #248 OR #249 OR #250 OR #251 OR<br>#252 OR #253 OR #254 OR #255 OR #256 OR #257 OR #258<br>OR #259 OR #260 OR #261 OR #262 OR #263 OR #264 OR<br>#265 OR #266 OR #267 OR #268 OR #269 OR #270 OR #271<br>OR #272 OR #273 OR #274 OR #275 | 81759 |
| #275 | 'vp16213':ab,ti                                                                                                                                                                                                                                                                                                     | 8     |
| #274 | 'vp16-213':ab,ti                                                                                                                                                                                                                                                                                                    | 140   |
| #273 | 'vp16 213':ab,ti                                                                                                                                                                                                                                                                                                    | 140   |
| #272 | 'vp16':ab,ti                                                                                                                                                                                                                                                                                                        | 2828  |
| #271 | 'vp-tec':ab,ti                                                                                                                                                                                                                                                                                                      | 0     |
| #270 | 'vp 16213':ab,ti                                                                                                                                                                                                                                                                                                    | 21    |
| #269 | 'vp 16-213':ab,ti                                                                                                                                                                                                                                                                                                   | 385   |
| #268 | 'vp 16 213':ab,ti                                                                                                                                                                                                                                                                                                   | 385   |
| #267 | 'vp 16':ab,ti                                                                                                                                                                                                                                                                                                       | 3198  |
| #266 | 'vespid':ab,ti                                                                                                                                                                                                                                                                                                      | 288   |
| #265 | 'vepeside':ab,ti                                                                                                                                                                                                                                                                                                    | 56    |
| #264 | 'vepesid':ab,ti                                                                                                                                                                                                                                                                                                     | 112   |
| #263 | 'topresid':ab,ti                                                                                                                                                                                                                                                                                                    | 0     |
| #262 | 'toposar':ab,ti                                                                                                                                                                                                                                                                                                     | 0     |
| #261 | 'posid':ab,ti                                                                                                                                                                                                                                                                                                       | 0     |
| #260 | 'nsc141540':ab,ti                                                                                                                                                                                                                                                                                                   | 0     |
| #259 | 'nsc 141540':ab,ti                                                                                                                                                                                                                                                                                                  | 29    |
| #258 | 'nk171':ab,ti                                                                                                                                                                                                                                                                                                       | 3     |
| #257 | 'nk 171':ab,ti                                                                                                                                                                                                                                                                                                      | 10    |
| #256 | 'nexvep':ab,ti                                                                                                                                                                                                                                                                                                      | 0     |
| #255 | 'lastet-s':ab,ti                                                                                                                                                                                                                                                                                                    | 0     |
| #254 | 'lastet':ab,ti                                                                                                                                                                                                                                                                                                      | 10    |

---

---

|      |                                                                                                                                                                                                                                                                                                                                                                                                                                                                                                                                                                                                            |        |
|------|------------------------------------------------------------------------------------------------------------------------------------------------------------------------------------------------------------------------------------------------------------------------------------------------------------------------------------------------------------------------------------------------------------------------------------------------------------------------------------------------------------------------------------------------------------------------------------------------------------|--------|
| #253 | 'etosid':ab,ti                                                                                                                                                                                                                                                                                                                                                                                                                                                                                                                                                                                             | 3      |
| #252 | 'etopoxan':ab,ti                                                                                                                                                                                                                                                                                                                                                                                                                                                                                                                                                                                           | 0      |
| #251 | 'etoposido':ab,ti                                                                                                                                                                                                                                                                                                                                                                                                                                                                                                                                                                                          | 5      |
| #250 | 'etoposide toniribate':ab,ti                                                                                                                                                                                                                                                                                                                                                                                                                                                                                                                                                                               | 0      |
| #249 | 'etoposid':ab,ti                                                                                                                                                                                                                                                                                                                                                                                                                                                                                                                                                                                           | 187    |
| #248 | 'etopos':ab,ti                                                                                                                                                                                                                                                                                                                                                                                                                                                                                                                                                                                             | 0      |
| #247 | 'etopol':ab,ti                                                                                                                                                                                                                                                                                                                                                                                                                                                                                                                                                                                             | 0      |
| #246 | 'etophos':ab,ti                                                                                                                                                                                                                                                                                                                                                                                                                                                                                                                                                                                            | 3      |
| #245 | 'etomedec':ab,ti                                                                                                                                                                                                                                                                                                                                                                                                                                                                                                                                                                                           | 0      |
| #244 | 'etomedac':ab,ti                                                                                                                                                                                                                                                                                                                                                                                                                                                                                                                                                                                           | 0      |
| #243 | 'epsidox':ab,ti                                                                                                                                                                                                                                                                                                                                                                                                                                                                                                                                                                                            | 0      |
| #242 | 'eposin':ab,ti                                                                                                                                                                                                                                                                                                                                                                                                                                                                                                                                                                                             | 0      |
| #241 | 'citodox':ab,ti                                                                                                                                                                                                                                                                                                                                                                                                                                                                                                                                                                                            | 0      |
| #240 | 'celltop':ab,ti                                                                                                                                                                                                                                                                                                                                                                                                                                                                                                                                                                                            | 4      |
| #239 | 'etoposide'/exp                                                                                                                                                                                                                                                                                                                                                                                                                                                                                                                                                                                            | 79292  |
| #238 | #232 OR #233 OR #234 OR #235 OR #236 OR #237                                                                                                                                                                                                                                                                                                                                                                                                                                                                                                                                                               | 95366  |
| #237 | 'vincrisul':ab,ti                                                                                                                                                                                                                                                                                                                                                                                                                                                                                                                                                                                          | 3      |
| #236 | 'vincristin':ab,ti                                                                                                                                                                                                                                                                                                                                                                                                                                                                                                                                                                                         | 514    |
| #235 | 'vin cristine':ab,ti                                                                                                                                                                                                                                                                                                                                                                                                                                                                                                                                                                                       | 15     |
| #234 | 'l37231':ab,ti                                                                                                                                                                                                                                                                                                                                                                                                                                                                                                                                                                                             | 0      |
| #233 | 'l 37231':ab,ti                                                                                                                                                                                                                                                                                                                                                                                                                                                                                                                                                                                            | 0      |
| #232 | 'vincristine'/exp                                                                                                                                                                                                                                                                                                                                                                                                                                                                                                                                                                                          | 95259  |
| #231 | #161 OR #162 OR #163 OR #164 OR #165 OR #166 OR #167<br>OR #168 OR #169 OR #170 OR #171 OR #172 OR #173 OR<br>#174 OR #175 OR #176 OR #177 OR #178 OR #179 OR #180<br>OR #181 OR #182 OR #183 OR #184 OR #185 OR #186 OR<br>#187 OR #188 OR #189 OR #190 OR #191 OR #192 OR #193<br>OR #194 OR #195 OR #196 OR #197 OR #198 OR #199 OR<br>#200 OR #201 OR #202 OR #203 OR #204 OR #205 OR #206<br>OR #207 OR #208 OR #209 OR #210 OR #211 OR #212 OR<br>#213 OR #214 OR #215 OR #216 OR #217 OR #218 OR #219<br>OR #220 OR #221 OR #222 OR #223 OR #224 OR #225 OR<br>#226 OR #227 OR #228 OR #229 OR #230 | 360941 |
| #230 | 'valchlor':ab,ti                                                                                                                                                                                                                                                                                                                                                                                                                                                                                                                                                                                           | 4      |
| #229 | 't 1024':ab,ti                                                                                                                                                                                                                                                                                                                                                                                                                                                                                                                                                                                             | 2      |
| #228 | 'stickstoffsensfgas':ab,ti                                                                                                                                                                                                                                                                                                                                                                                                                                                                                                                                                                                 | 0      |
| #227 | 'stickstofflost':ab,ti                                                                                                                                                                                                                                                                                                                                                                                                                                                                                                                                                                                     | 2      |
| #226 | 'sk 101':ab,ti                                                                                                                                                                                                                                                                                                                                                                                                                                                                                                                                                                                             | 1      |
| #225 | 'para nitro n (2 thiazolyl) benzenesulfonamide':ab,ti                                                                                                                                                                                                                                                                                                                                                                                                                                                                                                                                                      | 0      |
| #224 | 'onco cloramin':ab,ti                                                                                                                                                                                                                                                                                                                                                                                                                                                                                                                                                                                      | 0      |
| #223 | 'nsc 762':ab,ti                                                                                                                                                                                                                                                                                                                                                                                                                                                                                                                                                                                            | 12     |
| #222 | 'nm':ab,ti                                                                                                                                                                                                                                                                                                                                                                                                                                                                                                                                                                                                 | 344580 |
| #221 | 'nitrogranulogen':ab,ti                                                                                                                                                                                                                                                                                                                                                                                                                                                                                                                                                                                    | 61     |
| #220 | 'nitrogen mustard':ab,ti                                                                                                                                                                                                                                                                                                                                                                                                                                                                                                                                                                                   | 3314   |

---

---

|      |                                                                      |      |
|------|----------------------------------------------------------------------|------|
| #219 | 'nitrasin':ab,ti                                                     | 0    |
| #218 | 'nitol':ab,ti                                                        | 9    |
| #217 | 'n methyllost; n yperit; n, n bis (2 chloroethyl) methylamine':ab,ti | 0    |
| #216 | 'mustine hydrochloride boots':ab,ti                                  | 0    |
| #215 | 'mustine hydrochloride':ab,ti                                        | 30   |
| #214 | 'mustine':ab,ti                                                      | 143  |
| #213 | 'mustarnitrogen':ab,ti                                               | 2    |
| #212 | 'mustargin hydrochloride':ab,ti                                      | 0    |
| #211 | 'mustargen hydrochloride':ab,ti                                      | 1    |
| #210 | 'mustargen':ab,ti                                                    | 32   |
| #209 | 'mustard nitrogen':ab,ti                                             | 8    |
| #208 | 'mitoxine':ab,ti                                                     | 1    |
| #207 | 'methyl di (2 chloroethyl) amine hydrochloride':ab,ti                | 0    |
| #206 | 'methylchlorethamine':ab,ti                                          | 2    |
| #205 | 'methylbischloroethylamine':ab,ti                                    | 0    |
| #204 | 'methylbis (beta chloroethyl) amine hydrochloride':ab,ti             | 0    |
| #203 | 'methyl di (2 chloroethyl) amine hydrochloride':ab,ti                | 0    |
| #202 | 'methyl bis (beta chloroethyl) amine hydrochloride':ab,ti            | 14   |
| #201 | 'methyl bis (beta chloroethyl) amine':ab,ti                          | 36   |
| #200 | 'methyl bis (2 choroethyl) amine':ab,ti                              | 0    |
| #199 | 'methyl bis beta chloroethylamine':ab,ti                             | 4    |
| #198 | 'mechlorethamine hydrochloride':ab,ti                                | 79   |
| #197 | 'mechlorethamine':ab,ti                                              | 833  |
| #196 | 'mebichloramine':ab,ti                                               | 0    |
| #195 | 'mba hydrochloride':ab,ti                                            | 0    |
| #194 | 'mba':ab,ti                                                          | 1549 |
| #193 | 'ledaga':ab,ti                                                       | 1    |
| #192 | 'karyolysine':ab,ti                                                  | 0    |
| #191 | 'hn2 hydrochloride':ab,ti                                            | 0    |
| #190 | 'hn2':ab,ti                                                          | 345  |
| #189 | 'erasin':ab,ti                                                       | 3    |
| #188 | 'embikhine':ab,ti                                                    | 1    |
| #187 | 'embichine':ab,ti                                                    | 11   |
| #186 | 'dimitan':ab,ti                                                      | 0    |
| #185 | 'dichloren':ab,ti                                                    | 3    |
| #184 | 'di (chloroethyl) methylamine hydrochloride':ab,ti                   | 0    |
| #183 | 'dema':ab,ti                                                         | 71   |
| #182 | 'clormethine':ab,ti                                                  | 0    |
| #181 | 'cloramin':ab,ti                                                     | 10   |
| #180 | 'clearazide':ab,ti                                                   | 0    |
| #179 | 'chloroethazin':ab,ti                                                | 0    |
| #178 | 'chlormethine chlorhydrate':ab,ti                                    | 2    |
| #177 | 'chlorethazine':ab,ti                                                | 0    |

---

---

|      |                                                                                                                                                                                                                                                                                  |       |
|------|----------------------------------------------------------------------------------------------------------------------------------------------------------------------------------------------------------------------------------------------------------------------------------|-------|
| #176 | 'chloramine fahlberg':ab,ti                                                                                                                                                                                                                                                      | 2     |
| #175 | 'chloramin':ab,ti                                                                                                                                                                                                                                                                | 65    |
| #174 | 'chlomethine':ab,ti                                                                                                                                                                                                                                                              | 0     |
| #173 | 'caryolysine':ab,ti                                                                                                                                                                                                                                                              | 15    |
| #172 | 'cariolysine':ab,ti                                                                                                                                                                                                                                                              | 1     |
| #171 | 'cariolisin':ab,ti                                                                                                                                                                                                                                                               | 0     |
| #170 | 'c6866':ab,ti                                                                                                                                                                                                                                                                    | 0     |
| #169 | 'c 6866':ab,ti                                                                                                                                                                                                                                                                   | 0     |
| #168 | 'bis (chlorethylamine) hydrochloride':ab,ti                                                                                                                                                                                                                                      | 1     |
| #167 | 'bis (2 chloroethyl) methylamine':ab,ti                                                                                                                                                                                                                                          | 31    |
| #166 | 'azotyperite':ab,ti                                                                                                                                                                                                                                                              | 0     |
| #165 | 'azotoyperite':ab,ti                                                                                                                                                                                                                                                             | 2     |
| #164 | 'azotoyperit':ab,ti                                                                                                                                                                                                                                                              | 0     |
| #163 | 'antimit':ab,ti                                                                                                                                                                                                                                                                  | 1     |
| #162 | '2, 2 dichloro n methyldiethylamine hydrochloride':ab,ti                                                                                                                                                                                                                         | 1     |
| #161 | 'chlormethine'/exp                                                                                                                                                                                                                                                               | 13302 |
| #160 | #127 OR #128 OR #129 OR #130 OR #131 OR #132 OR #133<br>OR #134 OR #135 OR #136 OR #137 OR #138 OR #139 OR<br>#140 OR #141 OR #142 OR #143 OR #144 OR #145 OR #146<br>OR #147 OR #148 OR #149 OR #150 OR #151 OR #152 OR<br>#153 OR #154 OR #155 OR #156 OR #157 OR #158 OR #159 | 18934 |
| #159 | 'nsc 45388':ab,ti                                                                                                                                                                                                                                                                | 92    |
| #158 | 'imidazole 4 carboxamide 5 dimethyltriazeno':ab,ti                                                                                                                                                                                                                               | 0     |
| #157 | 'dtic-vhb':ab,ti                                                                                                                                                                                                                                                                 | 0     |
| #156 | 'dtic-dome':ab,ti                                                                                                                                                                                                                                                                | 7     |
| #155 | 'dtic dome':ab,ti                                                                                                                                                                                                                                                                | 7     |
| #154 | 'dtic':ab,ti                                                                                                                                                                                                                                                                     | 1547  |
| #153 | 'dimethyltriazenoimidazolecarboxamine':ab,ti                                                                                                                                                                                                                                     | 0     |
| #152 | 'dimethyltriazenoimidazolecarboxamide':ab,ti                                                                                                                                                                                                                                     | 0     |
| #151 | 'dimethyltriazenoimidazole carboxamide':ab,ti                                                                                                                                                                                                                                    | 21    |
| #150 | 'dimethyltriazeno imidazole carboxamide':ab,ti                                                                                                                                                                                                                                   | 9     |
| #149 | 'dimethyl triazeno imidazole carboxamine':ab,ti                                                                                                                                                                                                                                  | 1     |
| #148 | 'detimedac':ab,ti                                                                                                                                                                                                                                                                | 0     |
| #147 | 'deticene':ab,ti                                                                                                                                                                                                                                                                 | 14    |
| #146 | 'decarbazine':ab,ti                                                                                                                                                                                                                                                              | 65    |
| #145 | 'dacatic':ab,ti                                                                                                                                                                                                                                                                  | 0     |
| #144 | 'dacarbazine for injection':ab,ti                                                                                                                                                                                                                                                | 0     |
| #143 | 'dacarbazine dome':ab,ti                                                                                                                                                                                                                                                         | 0     |
| #142 | 'dacarbazine dbl':ab,ti                                                                                                                                                                                                                                                          | 0     |
| #141 | 'dacarbazin':ab,ti                                                                                                                                                                                                                                                               | 46    |
| #140 | 'd.t.i.c.; d.t.i.c.-dome':ab,ti                                                                                                                                                                                                                                                  | 0     |
| #139 | '5 dimethyltriazenoimidazole 4 carboxamide':ab,ti                                                                                                                                                                                                                                | 1     |
| #138 | '5 (dimethyltriazino) imidazole 4 carboxamide':ab,ti                                                                                                                                                                                                                             | 0     |
| #137 | '5 (dimethyltriazeno) imidazole 4 carboxamide':ab,ti                                                                                                                                                                                                                             | 6     |

---

---

|      |                                                                                                                                                                                      |       |
|------|--------------------------------------------------------------------------------------------------------------------------------------------------------------------------------------|-------|
| #136 | '5 (3, 3 dimethyltriazeno) imidazole 4 carboxamide':ab,ti                                                                                                                            | 2     |
| #135 | '5 (3, 3 dimethyl 1 triazeny) 1h imidazole 4 carboxamide':ab,ti                                                                                                                      | 9     |
| #134 | '5 (3, 3 dimethyl 1 triazeno) imidazole 5 carboxamide':ab,ti                                                                                                                         | 0     |
| #133 | '5 (3, 3 dimethyl 1 triazeno) imidazole 4 carboxamide':ab,ti                                                                                                                         | 132   |
| #132 | '5 (3, 3 dimethyl 1 thiazeno) imidazole 4 carboxamide':ab,ti                                                                                                                         | 0     |
| #131 | '4 (5) (3, 3 dimethyl 1 triazeno) imidazole 5 (4) carboxamide':ab,ti                                                                                                                 | 12    |
| #130 | '4 (3, 3 dimethyl 1 triazeno) imidazole 5 carboxamide':ab,ti                                                                                                                         | 4     |
| #129 | '3, 3 dimethyl 1 triazenoimidazole 4 carboxamide':ab,ti                                                                                                                              | 0     |
| #128 | '13, 5 (3, 3 dimethyl 1 triazeno) imidazole 4 carboxamide':ab,ti                                                                                                                     | 0     |
| #127 | 'dacarbazine'/exp                                                                                                                                                                    | 18653 |
| #126 | #110 OR #111 OR #112 OR #113 OR #114 OR #115 OR #116 OR #117 OR #118 OR #119 OR #120 OR #121 OR #122 OR #123 OR #124 OR #125                                                         | 34838 |
| #125 | 'vlb':ab,ti                                                                                                                                                                          | 439   |
| #124 | 'vinleucoblastine':ab,ti                                                                                                                                                             | 0     |
| #123 | 'vincoleukoblastin':ab,ti                                                                                                                                                            | 0     |
| #122 | 'vincoleucoblastine':ab,ti                                                                                                                                                           | 0     |
| #121 | 'vincoblastine':ab,ti                                                                                                                                                                | 3     |
| #120 | 'vincoblastin':ab,ti                                                                                                                                                                 | 1     |
| #119 | 'vincaleukoblastine':ab,ti                                                                                                                                                           | 79    |
| #118 | 'vincaleucoblastine':ab,ti                                                                                                                                                           | 20    |
| #117 | 'vincaleucoblastin':ab,ti                                                                                                                                                            | 4     |
| #116 | 'vinblastin':ab,ti                                                                                                                                                                   | 400   |
| #115 | 'vin blastine':ab,ti                                                                                                                                                                 | 0     |
| #114 | 'rozevin':ab,ti                                                                                                                                                                      | 0     |
| #113 | 'leukoblastin':ab,ti                                                                                                                                                                 | 0     |
| #112 | 'le29060':ab,ti                                                                                                                                                                      | 0     |
| #111 | 'le 29060':ab,ti                                                                                                                                                                     | 0     |
| #110 | 'vinblastine'/exp                                                                                                                                                                    | 34606 |
| #109 | #84 OR #85 OR #86 OR #87 OR #88 OR #89 OR #90 OR #91 OR #92 OR #93 OR #94 OR #95 OR #96 OR #97 OR #98 OR #99 OR #100 OR #101 OR #102 OR #103 OR #104 OR #105 OR #106 OR #107 OR #108 | 46640 |
| #108 | 'nsc125066':ab,ti                                                                                                                                                                    | 0     |
| #107 | 'nsc 125066':ab,ti                                                                                                                                                                   | 33    |
| #106 | 'bloicin-s':ab,ti                                                                                                                                                                    | 0     |
| #105 | 'blocamicina':ab,ti                                                                                                                                                                  | 0     |
| #104 | 'blexit':ab,ti                                                                                                                                                                       | 0     |
| #103 | 'bleomycinum':ab,ti                                                                                                                                                                  | 3     |
| #102 | 'bleomycins':ab,ti                                                                                                                                                                   | 184   |
| #101 | 'bleomycine':ab,ti                                                                                                                                                                   | 168   |
| #100 | 'bleomycin sulphate':ab,ti                                                                                                                                                           | 30    |
| #99  | 'bleomycin sulfatate':ab,ti                                                                                                                                                          | 149   |

---

---

|     |                                                                                                                                                                                                                                                                                                                                                                                                                                                                                             |        |
|-----|---------------------------------------------------------------------------------------------------------------------------------------------------------------------------------------------------------------------------------------------------------------------------------------------------------------------------------------------------------------------------------------------------------------------------------------------------------------------------------------------|--------|
| #98 | 'bleomycin derivative':ab,ti                                                                                                                                                                                                                                                                                                                                                                                                                                                                | 15     |
| #97 | 'bleomycin analog':ab,ti                                                                                                                                                                                                                                                                                                                                                                                                                                                                    | 21     |
| #96 | 'bleomicina':ab,ti                                                                                                                                                                                                                                                                                                                                                                                                                                                                          | 5      |
| #95 | 'bleolem':ab,ti                                                                                                                                                                                                                                                                                                                                                                                                                                                                             | 0      |
| #94 | 'bleocris':ab,ti                                                                                                                                                                                                                                                                                                                                                                                                                                                                            | 0      |
| #93 | 'bleocina':ab,ti                                                                                                                                                                                                                                                                                                                                                                                                                                                                            | 1      |
| #92 | 'bleocin':ab,ti                                                                                                                                                                                                                                                                                                                                                                                                                                                                             | 16     |
| #91 | 'bleo':ab,ti                                                                                                                                                                                                                                                                                                                                                                                                                                                                                | 359    |
| #90 | 'blenoxane':ab,ti                                                                                                                                                                                                                                                                                                                                                                                                                                                                           | 23     |
| #89 | 'blenamax':ab,ti                                                                                                                                                                                                                                                                                                                                                                                                                                                                            | 0      |
| #88 | 'blanoxan':ab,ti                                                                                                                                                                                                                                                                                                                                                                                                                                                                            | 0      |
| #87 | 'bl19125':ab,ti                                                                                                                                                                                                                                                                                                                                                                                                                                                                             | 0      |
| #86 | 'bl 19125':ab,ti                                                                                                                                                                                                                                                                                                                                                                                                                                                                            | 0      |
| #85 | 'bileco':ab,ti                                                                                                                                                                                                                                                                                                                                                                                                                                                                              | 0      |
| #84 | 'bleomycin'/exp                                                                                                                                                                                                                                                                                                                                                                                                                                                                             | 46535  |
| #83 | #18 OR #19 OR #20 OR #21 OR #22 OR #23 OR #24 OR #25<br>OR #26 OR #27 OR #28 OR #29 OR #30 OR #31 OR #32 OR<br>#33 OR #34 OR #35 OR #36 OR #37 OR #38 OR #39 OR #40<br>OR #41 OR #42 OR #43 OR #44 OR #45 OR #46 OR #47 OR<br>#48 OR #49 OR #50 OR #51 OR #52 OR #53 OR #54 OR #55<br>OR #56 OR #57 OR #58 OR #59 OR #60 OR #61 OR #62 OR<br>#63 OR #64 OR #65 OR #66 OR #67 OR #68 OR #69 OR #70<br>OR #71 OR #72 OR #73 OR #74 OR #75 OR #76 OR #77 OR<br>#78 OR #79 OR #80 OR #81 OR #82 | 170450 |
| #82 | 'tlc d 99':ab,ti                                                                                                                                                                                                                                                                                                                                                                                                                                                                            | 15     |
| #81 | 'sarcodoxome':ab,ti                                                                                                                                                                                                                                                                                                                                                                                                                                                                         | 1      |
| #80 | 'rubidox':ab,ti                                                                                                                                                                                                                                                                                                                                                                                                                                                                             | 0      |
| #79 | 'rubex':ab,ti                                                                                                                                                                                                                                                                                                                                                                                                                                                                               | 4      |
| #78 | 'rp25253':ab,ti                                                                                                                                                                                                                                                                                                                                                                                                                                                                             | 0      |
| #77 | 'rp 25253':ab,ti                                                                                                                                                                                                                                                                                                                                                                                                                                                                            | 0      |
| #76 | 'resmycin':ab,ti                                                                                                                                                                                                                                                                                                                                                                                                                                                                            | 0      |
| #75 | 'rastocin':ab,ti                                                                                                                                                                                                                                                                                                                                                                                                                                                                            | 0      |
| #74 | 'polyethylene glycol-coated liposomal doxorubicin':ab,ti                                                                                                                                                                                                                                                                                                                                                                                                                                    | 6      |
| #73 | 'pegylated liposomal doxorubicin':ab,ti                                                                                                                                                                                                                                                                                                                                                                                                                                                     | 1685   |
| #72 | 'nsc123127':ab,ti                                                                                                                                                                                                                                                                                                                                                                                                                                                                           | 0      |
| #71 | 'nsc 123127':ab,ti                                                                                                                                                                                                                                                                                                                                                                                                                                                                          | 116    |
| #70 | 'myocet':ab,ti                                                                                                                                                                                                                                                                                                                                                                                                                                                                              | 150    |
| #69 | 'mcc465':ab,ti                                                                                                                                                                                                                                                                                                                                                                                                                                                                              | 0      |
| #68 | 'mcc 465':ab,ti                                                                                                                                                                                                                                                                                                                                                                                                                                                                             | 8      |
| #67 | 'liposomal doxorubicin':ab,ti                                                                                                                                                                                                                                                                                                                                                                                                                                                               | 3003   |
| #66 | 'lipodox':ab,ti                                                                                                                                                                                                                                                                                                                                                                                                                                                                             | 34     |
| #65 | 'ifadox':ab,ti                                                                                                                                                                                                                                                                                                                                                                                                                                                                              | 0      |
| #64 | 'fi106':ab,ti                                                                                                                                                                                                                                                                                                                                                                                                                                                                               | 0      |
| #63 | 'fi 106':ab,ti                                                                                                                                                                                                                                                                                                                                                                                                                                                                              | 0      |

---

---

|     |                                   |       |
|-----|-----------------------------------|-------|
| #62 | 'farmiblastina':ab,ti             | 0     |
| #61 | 'evacet':ab,ti                    | 3     |
| #60 | 'doxorubin':ab,ti                 | 92    |
| #59 | 'doxorubicine':ab,ti              | 603   |
| #58 | 'doxorubicin, liposomal':ab,ti    | 46    |
| #57 | 'doxorubicin meiji':ab,ti         | 0     |
| #56 | 'doxorubicin hydrochloride':ab,ti | 943   |
| #55 | 'doxor lyo':ab,ti                 | 0     |
| #54 | 'doxolem':ab,ti                   | 0     |
| #53 | 'doxil (liposomal)':ab,ti         | 11    |
| #52 | 'doxil':ab,ti                     | 589   |
| #51 | 'dox sl':ab,ti                    | 14    |
| #50 | 'dexorubicin':ab,ti               | 12    |
| #49 | 'carcinocin':ab,ti                | 0     |
| #48 | 'carcinocin':ab,ti                | 0     |
| #47 | 'caelyx':ab,ti                    | 292   |
| #46 | 'caelix':ab,ti                    | 9     |
| #45 | 'amminac':ab,ti                   | 0     |
| #44 | 'adrubicin':ab,ti                 | 0     |
| #43 | 'adrimedac':ab,ti                 | 0     |
| #42 | 'adrim':ab,ti                     | 0     |
| #41 | 'adriblastine':ab,ti              | 43    |
| #40 | 'adriblastina pfs':ab,ti          | 0     |
| #39 | 'adriblastina cs':ab,ti           | 0     |
| #38 | 'adriblastina':ab,ti              | 18    |
| #37 | 'adriblastin':ab,ti               | 64    |
| #36 | 'adriamycina':ab,ti               | 0     |
| #35 | 'adriamycin rdf':ab,ti            | 2     |
| #34 | 'adriamycin rd':ab,ti             | 0     |
| #33 | 'adriamycin r.d.f.':ab,ti         | 0     |
| #32 | 'adriamycin pfs':ab,ti            | 1     |
| #31 | 'adriamycin p.f.s.':ab,ti         | 0     |
| #30 | 'adriamycin hydrochloride':ab,ti  | 21    |
| #29 | 'adriamycin':ab,ti                | 18720 |
| #28 | 'adriamicine':ab,ti               | 37    |
| #27 | 'adriamicina':ab,ti               | 10    |
| #26 | 'adriacin':ab,ti                  | 20    |
| #25 | 'adriablastine':ab,ti             | 24    |
| #24 | 'adriablastina r.d.':ab,ti        | 0     |
| #23 | 'adriablastina':ab,ti             | 5     |
| #22 | 'adriablastin':ab,ti              | 62    |
| #21 | 'a.d.mycin':ab,ti                 | 0     |
| #20 | '14 hydroxydaunorubicin':ab,ti    | 1     |
| #19 | '14 hydroxydaunomycin':ab,ti      | 7     |

---

|     |                                                                                                        |        |
|-----|--------------------------------------------------------------------------------------------------------|--------|
| #18 | 'doxorubicin'/exp                                                                                      | 168249 |
| #17 | #1 OR #2 OR #3 OR #4 OR #5 OR #6 OR #7 OR #8 OR #9<br>OR #10 OR #11 OR #12 OR #13 OR #14 OR #15 OR #16 | 70057  |
| #16 | 'reed sternberg disease':ab,ti                                                                         | 0      |
| #15 | 'reed hodgkin disease':ab,ti                                                                           | 0      |
| #14 | 'morbus hodgkin':ab,ti                                                                                 | 75     |
| #13 | 'malignant lymphogranulomatosis':ab,ti                                                                 | 156    |
| #12 | 'malignant lymphogranuloma':ab,ti                                                                      | 232    |
| #11 | 'lymphoma, hodgkin':ab,ti                                                                              | 468    |
| #10 | 'lymphogranulomatosis':ab,ti                                                                           | 2090   |
| #9  | 'lymphogranuloma, malignant':ab,ti                                                                     | 1      |
| #8  | 'lymphogranuloma malignum':ab,ti                                                                       | 4      |
| #7  | 'lymphogranuloma maligne':ab,ti                                                                        | 0      |
| #6  | 'hodgkins disease':ab,ti                                                                               | 218    |
| #5  | 'hodgkin sclerosis':ab,ti                                                                              | 1      |
| #4  | 'hodgkin lymphoma':ab,ti                                                                               | 24759  |
| #3  | 'granulomatosis, malignant':ab,ti                                                                      | 6      |
| #2  | 'disease, hodgkin':ab,ti                                                                               | 66     |
| #1  | 'hodgkin disease'/exp                                                                                  | 55449  |



---

**Table S3** Source: Cochrane Library (Searched on: 3 April 2018)

---

| Search | Query                                                                     |
|--------|---------------------------------------------------------------------------|
| #1     | MeSH descriptor: [Hodgkin Disease] explode all trees                      |
| #2     | Disease, Hodgkin:ti,ab,kw (Word variations have been searched)            |
| #3     | Granuloma, Hodgkin's:ti,ab,kw (Word variations have been searched)        |
| #4     | Hodgkin's Granuloma:ti,ab,kw (Word variations have been searched)         |
| #5     | Granuloma, Hodgkins:ti,ab,kw (Word variations have been searched)         |
| #6     | Hodgkins Granuloma:ti,ab,kw (Word variations have been searched)          |
| #7     | Lymphogranuloma, Malignant:ti,ab,kw (Word variations have been searched)  |
| #8     | Lymphogranulomas, Malignant:ti,ab,kw (Word variations have been searched) |
| #9     | Malignant Lymphogranuloma:ti,ab,kw (Word variations have been searched)   |
| #10    | Malignant Lymphogranulomas:ti,ab,kw (Word variations have been searched)  |
| #11    | Hodgkin Lymphoma:ti,ab,kw (Word variations have been searched)            |
| #12    | Lymphoma, Hodgkin:ti,ab,kw (Word variations have been searched)           |
| #13    | Hodgkin's Disease:ti,ab,kw (Word variations have been searched)           |
| #14    | Disease, Hodgkin's:ti,ab,kw (Word variations have been searched)          |
| #15    | Hodgkin's Lymphoma:ti,ab,kw (Word variations have been searched)          |
| #16    | Hodgkins Lymphoma:ti,ab,kw (Word variations have been searched)           |
| #17    | Lymphoma, Hodgkin's:ti,ab,kw (Word variations have been searched)         |
| #18    | Hodgkins Disease:ti,ab,kw (Word variations have been searched)            |
| #19    | Disease, Hodgkins:ti,ab,kw (Word variations have been searched)           |
| #20    | Granuloma, Hodgkin:ti,ab,kw (Word variations have been searched)          |
| #21    | Hodgkin Granuloma:ti,ab,kw (Word variations have been searched)           |
| #22    | Granuloma, Malignant:ti,ab,kw (Word variations have been searched)        |

---

- 
- #23 Malignant Granuloma:ti,ab,kw (Word variations have been searched)
- #24 Malignant Granulomas:ti,ab,kw (Word variations have been searched)
- #25 Nodular Lymphocyte-Predominant Hodgkin's Lymphoma:ti,ab,kw  
(Word variations have been searched)
- #26 Nodular Lymphocyte Predominant Hodgkin's Lymphoma:ti,ab,kw  
(Word variations have been searched)
- #27 Nodular Sclerosing Hodgkin's Lymphoma:ti,ab,kw (Word variations  
have been searched)
- #28 Lymphocyte-Rich Classical Hodgkin's Lymphoma:ti,ab,kw (Word  
variations have been searched)
- #29 Lymphocyte Rich Classical Hodgkin's Lymphoma:ti,ab,kw (Word  
variations have been searched)
- #30 Mixed Cellularity Hodgkin's Lymphoma:ti,ab,kw (Word variations have  
been searched)
- #31 Hodgkin Lymphoma, Adult:ti,ab,kw (Word variations have been  
searched)
- #32 Adult Hodgkin Lymphoma:ti,ab,kw (Word variations have been  
searched)
- #33 Lymphocyte Depletion Hodgkin's Lymphoma:ti,ab,kw (Word variations  
have been searched)
- #34 #1 or #2 or #3 or #4 or #5 or #6 or #7 or #8 or #9 or #10 or #11 or #12 or  
#13 or #14 or #15 or #16 or #17 or #18 or #19 or #20 or #21 or #22 or #23  
or #24 or #25 or #26 or #27 or #28 or #29 or #30 or #31 or #32 or #33
- #35 brentuximab vedotin:ti,ab,kw (Word variations have been searched)
- #36 CAC10-1006:ti,ab,kw (Word variations have been searched)
- #37 cAC10-vcMMAE:ti,ab,kw (Word variations have been searched)
- #38 Adcetris:ti,ab,kw (Word variations have been searched)
- #39 SGN-35:ti,ab,kw (Word variations have been searched)
- #40 #35 or #36 or #37 or #38 or #39
- #41 MeSH descriptor: [Procarbazine] explode all trees
- #42 Procarbazine Monohydrobromide:ti,ab,kw (Word variations have been  
searched)
- #43 Monohydrobromide, Procarbazine:ti,ab,kw (Word variations have been  
searched)
- #44 Procarbazine Hydrochloride:ti,ab,kw (Word variations have been  
searched)
-

- 
- #45 Hydrochloride, Procarbazine:ti,ab,kw (Word variations have been searched)
- #46 Procarbazine Monohydrochloride:ti,ab,kw (Word variations have been searched)
- #47 Monohydrochloride, Procarbazine:ti,ab,kw (Word variations have been searched)
- #48 Matulane:ti,ab,kw (Word variations have been searched)
- #49 Natulan:ti,ab,kw (Word variations have been searched)
- #50 #41 or #42 or #43 or #44 or #45 or #46 or #47 or #48 or #49
- #51 MeSH descriptor: [Bleomycin] explode all trees
- #52 Bleomycins:ti,ab,kw (Word variations have been searched)
- #53 BLEO-cell:ti,ab,kw (Word variations have been searched)
- #54 BLEO cell:ti,ab,kw (Word variations have been searched)
- #55 BLEOcell:ti,ab,kw (Word variations have been searched)
- #56 Bleolem:ti,ab,kw (Word variations have been searched)
- #57 Bléomycine Bellon:ti,ab,kw (Word variations have been searched)
- #58 Bellon, Bléomycine:ti,ab,kw (Word variations have been searched)
- #59 Bleomycin A2:ti,ab,kw (Word variations have been searched)
- #60 Bleomycin A(2):ti,ab,kw (Word variations have been searched)
- #61 Bleomycin B2:ti,ab,kw (Word variations have been searched)
- #62 Bleomycin B(2):ti,ab,kw (Word variations have been searched)
- #63 Bleomycin Sulfate:ti,ab,kw (Word variations have been searched)
- #64 Sulfate, Bleomycin:ti,ab,kw (Word variations have been searched)
- #65 Bleomycinum Mack:ti,ab,kw (Word variations have been searched)
- #66 Mack, Bleomycinum:ti,ab,kw (Word variations have been searched)
- #67 Blenoxane:ti,ab,kw (Word variations have been searched)
- #68 Blanoxan:ti,ab,kw (Word variations have been searched)
-

- 
- #69 Bleomicina:ti,ab,kw (Word variations have been searched)
- #70 #51 or #52 or #53 or #54 or #55 or #56 or #57 or #58 or #59 or #60 or #61 or #62 or #63 or #64 or #65 or #66 or #67 or #68 or #69
- #71 MeSH descriptor: [Dacarbazine] explode all trees
- #72 Dimethyl Imidazole Carboxamide:ti,ab,kw (Word variations have been searched)
- #73 Carboxamide, Dimethyl Imidazole:ti,ab,kw (Word variations have been searched)
- #74 Imidazole Carboxamide, Dimethyl:ti,ab,kw (Word variations have been searched)
- #75 DTIC:ti,ab,kw (Word variations have been searched)
- #76 ICDT:ti,ab,kw (Word variations have been searched)
- #77 Decarbazine:ti,ab,kw (Word variations have been searched)
- #78 5-(3,3-Dimethyl-1-triazeno)imidazole-4-carboxamide:ti,ab,kw (Word variations have been searched)
- #79 DIC:ti,ab,kw (Word variations have been searched)
- #80 Dimethyl Triazeno Imidazole Carboxamide:ti,ab,kw (Word variations have been searched)
- #81 NSC-45388:ti,ab,kw (Word variations have been searched)
- #82 NSC 45388:ti,ab,kw (Word variations have been searched)
- #83 NSC45388:ti,ab,kw (Word variations have been searched)
- #84 DTIC-Dome:ti,ab,kw (Word variations have been searched)
- #85 DTIC Dome:ti,ab,kw (Word variations have been searched)
- #86 DTICDome:ti,ab,kw (Word variations have been searched)
- #87 Biocarbazine:ti,ab,kw (Word variations have been searched)
- #88 Deticene:ti,ab,kw (Word variations have been searched)
- #89 #71 or #72 or #73 or #74 or #75 or #76 or #77 or #78 or #79 or #80 or #81 or #82 or #83 or #84 or #85 or #86 or #87 or #88
- #90 MeSH descriptor: [Mechlorethamine] explode all trees
- #91 Chlormethine:ti,ab,kw (Word variations have been searched)
-

---

|      |                                                                                      |
|------|--------------------------------------------------------------------------------------|
| #92  | Bis(2-chloroethyl)methylamine:ti,ab,kw (Word variations have been searched)          |
| #93  | Mustine:ti,ab,kw (Word variations have been searched)                                |
| #94  | Nitrogen Mustard:ti,ab,kw (Word variations have been searched)                       |
| #95  | Chlorethazine:ti,ab,kw (Word variations have been searched)                          |
| #96  | Embichin:ti,ab,kw (Word variations have been searched)                               |
| #97  | Mechlorethamine Hydrochloride:ti,ab,kw (Word variations have been searched)          |
| #98  | Hydrochloride, Mechlorethamine:ti,ab,kw (Word variations have been searched)         |
| #99  | Mechlorethamine Hydrochloride N-Oxide:ti,ab,kw (Word variations have been searched)  |
| #100 | Hydrochloride N-Oxide, Mechlorethamine:ti,ab,kw (Word variations have been searched) |
| #101 | Mechlorethamine Hydrochloride N Oxide:ti,ab,kw (Word variations have been searched)  |
| #102 | N-Oxide, Mechlorethamine Hydrochloride:ti,ab,kw (Word variations have been searched) |
| #103 | NSC-762:ti,ab,kw (Word variations have been searched)                                |
| #104 | NSC 762:ti,ab,kw (Word variations have been searched)                                |
| #105 | NSC762:ti,ab,kw (Word variations have been searched)                                 |
| #106 | Mechlorethamine Oxide:ti,ab,kw (Word variations have been searched)                  |
| #107 | Mitomen:ti,ab,kw (Word variations have been searched)                                |
| #108 | Mustargen:ti,ab,kw (Word variations have been searched)                              |
| #109 | Nitrogranulogen:ti,ab,kw (Word variations have been searched)                        |
| #110 | Nitromin:ti,ab,kw (Word variations have been searched)                               |
| #111 | NSC-10107:ti,ab,kw (Word variations have been searched)                              |
| #112 | NSC 10107:ti,ab,kw (Word variations have been searched)                              |
| #113 | NSC10107:ti,ab,kw (Word variations have been searched)                               |
| #114 | Caryolysine:ti,ab,kw (Word variations have been searched)                            |

---

- 
- #115 Mechllorethamine N-Oxide:ti,ab,kw (Word variations have been searched)
- #116 Mechllorethamine N Oxide:ti,ab,kw (Word variations have been searched)
- #117 Nitrogen Mustard N-Oxide:ti,ab,kw (Word variations have been searched)
- #118 N-Oxide, Nitrogen Mustard:ti,ab,kw (Word variations have been searched)
- #119 Nitrogen Mustard N Oxide:ti,ab,kw (Word variations have been searched)
- #120 #90 or #91 or #92 or #93 or #94 or #95 or #96 or #97 or #98 or #99 or #100 or #101 or #102 or #103 or #104 or #105 or #106 or #107 or #108 or #109 or #110 or #111 or #112 or #113 or #114 or #115 or #116 or #117 or #118 or #119
- #121 MeSH descriptor: [Doxorubicin] explode all trees
- #122 Farmiblastina:ti,ab,kw (Word variations have been searched)
- #123 Ribodoxo:ti,ab,kw (Word variations have been searched)
- #124 Rubex:ti,ab,kw (Word variations have been searched)
- #125 Adriamycin:ti,ab,kw (Word variations have been searched)
- #126 Adriblastin:ti,ab,kw (Word variations have been searched)
- #127 Adriblastine:ti,ab,kw (Word variations have been searched)
- #128 Adriblastina:ti,ab,kw (Word variations have been searched)
- #129 Adriablastine:ti,ab,kw (Word variations have been searched)
- #130 Adriablastin:ti,ab,kw (Word variations have been searched)
- #131 Adrimedac:ti,ab,kw (Word variations have been searched)
- #132 DOXO-cell:ti,ab,kw (Word variations have been searched)
- #133 DOXO cell:ti,ab,kw (Word variations have been searched)
- #134 Urokit Doxo-cell:ti,ab,kw (Word variations have been searched)
- #135 Urokit Doxo cell:ti,ab,kw (Word variations have been searched)
- #136 Doxolem:ti,ab,kw (Word variations have been searched)
-

- 
- #137 Doxorubicin Hexal:ti,ab,kw (Word variations have been searched)
- #138 Doxorubicin Hydrochloride:ti,ab,kw (Word variations have been searched)
- #139 Hydrochloride, Doxorubicin:ti,ab,kw (Word variations have been searched)
- #140 Doxorubicin NC:ti,ab,kw (Word variations have been searched)
- #141 Doxorubicina Ferrer Farm:ti,ab,kw (Word variations have been searched)
- #142 Doxorubicina Funk:ti,ab,kw (Word variations have been searched)
- #143 Doxorubicina Tedec:ti,ab,kw (Word variations have been searched)
- #144 Doxorubicine Baxter:ti,ab,kw (Word variations have been searched)
- #145 Doxotec:ti,ab,kw (Word variations have been searched)
- #146 Myocet:ti,ab,kw (Word variations have been searched)
- #147 Onkodox:ti,ab,kw (Word variations have been searched)
- #148 #121 or #122 or #123 or #124 or #125 or #126 or #127 or #128 or #129 or #130 or #131 or #132 or #133 or #134 or #135 or #136 or #137 or #138 or #139 or #140 or #141 or #142 or #143 or #144 or #145 or #146 or #147
- #149 MeSH descriptor: [Cyclophosphamide] explode all trees
- #150 Cytophosphane:ti,ab,kw (Word variations have been searched)
- #151 Cyclophosphamide Monohydrate:ti,ab,kw (Word variations have been searched)
- #152 Monohydrate, Cyclophosphamide:ti,ab,kw (Word variations have been searched)
- #153 Cyclophosphane:ti,ab,kw (Word variations have been searched)
- #154 Cyclophosphamide Anhydrous:ti,ab,kw (Word variations have been searched)
- #155 Anhydrous, Cyclophosphamide:ti,ab,kw (Word variations have been searched)
- #156 Cyclophosphamide, (R)-Isomer:ti,ab,kw (Word variations have been searched)
- #157 Cyclophosphamide, (S)-Isomer:ti,ab,kw (Word variations have been searched)
- #158 Cytophosphan:ti,ab,kw (Word variations have been searched)
- #159 Endoxan:ti,ab,kw (Word variations have been searched)
-

- 
- #160 Neosar:ti,ab,kw (Word variations have been searched)
- #161 NSC-26271:ti,ab,kw (Word variations have been searched)
- #162 NSC 26271:ti,ab,kw (Word variations have been searched)
- #163 NSC26271:ti,ab,kw (Word variations have been searched)
- #164 Procytox:ti,ab,kw (Word variations have been searched)
- #165 Sendoxan:ti,ab,kw (Word variations have been searched)
- #166 B-518:ti,ab,kw (Word variations have been searched)
- #167 B 518:ti,ab,kw (Word variations have been searched)
- #168 B518:ti,ab,kw (Word variations have been searched)
- #169 Cytosan:ti,ab,kw (Word variations have been searched)
- #170 #149 or #150 or #151 or #152 or #153 or #154 or #155 or #156 or #157 or #158 or #159 or #160 or #161 or #162 or #163 or #164 or #165 or #166 or #167 or #168 or #169
- #171 MeSH descriptor: [Prednisone] explode all trees
- #172 Dehydrocortisone:ti,ab,kw (Word variations have been searched)
- #173 delta-Cortisone:ti,ab,kw (Word variations have been searched)
- #174 Rectodelt:ti,ab,kw (Word variations have been searched)
- #175 Prednison Hexal:ti,ab,kw (Word variations have been searched)
- #176 Sterapred:ti,ab,kw (Word variations have been searched)
- #177 Ultracorten:ti,ab,kw (Word variations have been searched)
- #178 Winpred:ti,ab,kw (Word variations have been searched)
- #179 Apo-Prednisone:ti,ab,kw (Word variations have been searched)
- #180 Cortan:ti,ab,kw (Word variations have been searched)
- #181 Cortancyl:ti,ab,kw (Word variations have been searched)
- #182 Panafcort:ti,ab,kw (Word variations have been searched)
-



- 
- #183 Cutason:ti,ab,kw (Word variations have been searched)
- #184 Decortin:ti,ab,kw (Word variations have been searched)
- #185 Dacortin:ti,ab,kw (Word variations have been searched)
- #186 Decortisyl:ti,ab,kw (Word variations have been searched)
- #187 Deltasone:ti,ab,kw (Word variations have been searched)
- #188 Encortone:ti,ab,kw (Word variations have been searched)
- #189 Encorton:ti,ab,kw (Word variations have been searched)
- #190 Enkortolon:ti,ab,kw (Word variations have been searched)
- #191 Kortancyl:ti,ab,kw (Word variations have been searched)
- #192 Liquid Pred:ti,ab,kw (Word variations have been searched)
- #193 Meticorten:ti,ab,kw (Word variations have been searched)
- #194 Orasone:ti,ab,kw (Word variations have been searched)
- #195 Panasol:ti,ab,kw (Word variations have been searched)
- #196 Predni Tablinen:ti,ab,kw (Word variations have been searched)
- #197 Prednidib:ti,ab,kw (Word variations have been searched)
- #198 Predniment:ti,ab,kw (Word variations have been searched)
- #199 Prednison Acsis:ti,ab,kw (Word variations have been searched)
- #200 Acsis, Prednison:ti,ab,kw (Word variations have been searched)
- #201 Pronisone:ti,ab,kw (Word variations have been searched)
- #202 Sone:ti,ab,kw (Word variations have been searched)
- #203 Prednison Galen:ti,ab,kw (Word variations have been searched)
- #204 #171 or #172 or #173 or #174 or #175 or #176 or #177 or #178 or #179 or #180 or #181 or #182 or #183 or #184 or #185 or #186 or #187 or #188 or #189 or #190 or #191 or #192 or #193 or #194 or #195 or #196 or #197 or #198 or #199 or #200 or #201 or #202 or #203
- #205 MeSH descriptor: [Etoposide] explode all trees
-

---

|      |                                                                                                |
|------|------------------------------------------------------------------------------------------------|
| #206 | Demethyl Epipodophyllotoxin Ethylidine Glucoside:ti,ab,kw (Word variations have been searched) |
| #207 | Eposide:ti,ab,kw (Word variations have been searched)                                          |
| #208 | Etopos:ti,ab,kw (Word variations have been searched)                                           |
| #209 | Etoposide, (5a alpha,9 alpha)-Isomer:ti,ab,kw (Word variations have been searched)             |
| #210 | Etoposide, (5S)-Isomer:ti,ab,kw (Word variations have been searched)                           |
| #211 | Etoposide, alpha-D-Glucopyranosyl Isomer:ti,ab,kw (Word variations have been searched)         |
| #212 | Etoposide, alpha D Glucopyranosyl Isomer:ti,ab,kw (Word variations have been searched)         |
| #213 | alpha-D-Glucopyranosyl Isomer Etoposide:ti,ab,kw (Word variations have been searched)          |
| #214 | Etoposido Ferrer Farma:ti,ab,kw (Word variations have been searched)                           |
| #215 | Exitop:ti,ab,kw (Word variations have been searched)                                           |
| #216 | Lastet:ti,ab,kw (Word variations have been searched)                                           |
| #217 | NSC-141540:ti,ab,kw (Word variations have been searched)                                       |
| #218 | NSC 141540:ti,ab,kw (Word variations have been searched)                                       |
| #219 | NSC141540:ti,ab,kw (Word variations have been searched)                                        |
| #220 | Onkoposid:ti,ab,kw (Word variations have been searched)                                        |
| #221 | Riboposid:ti,ab,kw (Word variations have been searched)                                        |
| #222 | Toposar:ti,ab,kw (Word variations have been searched)                                          |
| #223 | Etoposide Teva:ti,ab,kw (Word variations have been searched)                                   |
| #224 | Teva, Etoposide:ti,ab,kw (Word variations have been searched)                                  |
| #225 | Vepesid:ti,ab,kw (Word variations have been searched)                                          |
| #226 | VP 16-213:ti,ab,kw (Word variations have been searched)                                        |
| #227 | VP 16 213:ti,ab,kw (Word variations have been searched)                                        |
| #228 | VP 16213:ti,ab,kw (Word variations have been searched)                                         |
| #229 | VP-16:ti,ab,kw (Word variations have been searched)                                            |

---

- 
- #230 VP 16:ti,ab,kw (Word variations have been searched)
- #231 VP16:ti,ab,kw (Word variations have been searched)
- #232 Vépéside-Sandoz:ti,ab,kw (Word variations have been searched)
- #233 Vépéside Sandoz:ti,ab,kw (Word variations have been searched)
- #234 Celltop:ti,ab,kw (Word variations have been searched)
- #235 Eposin:ti,ab,kw (Word variations have been searched)
- #236 Etomedac:ti,ab,kw (Word variations have been searched)
- #237 Eto-GRY:ti,ab,kw (Word variations have been searched)
- #238 Eto GRY:ti,ab,kw (Word variations have been searched)
- #239 Etoposide Pierre Fabre:ti,ab,kw (Word variations have been searched)
- #240 Etoposide, (5a alpha)-Isomer:ti,ab,kw (Word variations have been searched)
- #241 #205 or #206 or #207 or #208 or #209 or #210 or #211 or #212 or #213 or #214 or #215 or #216 or #217 or #218 or #219 or #220 or #221 or #222 or #223 or #224 or #225 or #226 or #227 or #228 or #229 or #230 or #231 or #232 or #233 or #234 or #235 or #236 or #237 or #238 or #239 or #240
- #242 MeSH descriptor: [Vinblastine] explode all trees
- #243 Vincalukoblastine:ti,ab,kw (Word variations have been searched)
- #244 Lemblastine:ti,ab,kw (Word variations have been searched)
- #245 Velban:ti,ab,kw (Word variations have been searched)
- #246 Vinblastina Lilly:ti,ab,kw (Word variations have been searched)
- #247 Velbe:ti,ab,kw (Word variations have been searched)
- #248 Vinblastine Sulfate:ti,ab,kw (Word variations have been searched)
- #249 Sulfate, Vinblastine:ti,ab,kw (Word variations have been searched)
- #250 Vinblastinsulfat-Gry:ti,ab,kw (Word variations have been searched)
- #251 Cellblastin:ti,ab,kw (Word variations have been searched)
- #252 Vinblastin Hexal:ti,ab,kw (Word variations have been searched)
-

- 
- #253 #242 or #243 or #244 or #245 or #246 or #247 or #248 or #249 or #250 or #251 or #252
- #254 MeSH descriptor: [Vincristine] explode all trees
- #255 Leurocristine:ti,ab,kw (Word variations have been searched)
- #256 Leurocristine:ti,ab,kw (Word variations have been searched)
- #257 Vincristine Sulfate:ti,ab,kw (Word variations have been searched)
- #258 Sulfate, Vincristine:ti,ab,kw (Word variations have been searched)
- #259 cellcristin:ti,ab,kw (Word variations have been searched)
- #260 Citomid:ti,ab,kw (Word variations have been searched)
- #261 Vincristin medac:ti,ab,kw (Word variations have been searched)
- #262 Oncovin:ti,ab,kw (Word variations have been searched)
- #263 Oncovine:ti,ab,kw (Word variations have been searched)
- #264 Onkocristin:ti,ab,kw (Word variations have been searched)
- #265 Vincasar:ti,ab,kw (Word variations have been searched)
- #266 Farmistin:ti,ab,kw (Word variations have been searched)
- #267 Vincasar PFS:ti,ab,kw (Word variations have been searched)
- #268 PFS, Vincasar:ti,ab,kw (Word variations have been searched)
- #269 Vincristin Bristol:ti,ab,kw (Word variations have been searched)
- #270 Vintec:ti,ab,kw (Word variations have been searched)
- #271 Vincrisul:ti,ab,kw (Word variations have been searched)
- #272 #254 or #255 or #256 or #257 or #258 or #259 or #260 or #261 or #262 or #263 or #264 or #265 or #266 or #267 or #268 or #269 or #270 or #271
- #273 #40 or #50 or #70 or #89 or #120 or #148 or #170 or #204 or #241 or #253 or #272
- #274 #34 and #273
-

**Table S4** The detailed characteristics of 12 combination chemotherapy regimens.

| <b>Regimens</b>                                                                 | <b>Drugs and Dose (mg/m<sup>2</sup>)</b> | <b>Route</b> | <b>Days</b>     | <b>Duration</b>                                                                                          |
|---------------------------------------------------------------------------------|------------------------------------------|--------------|-----------------|----------------------------------------------------------------------------------------------------------|
| ABVD                                                                            | Doxorubicin 25                           | IV           | 1,15            | Every 28 days × 6-8 cycles                                                                               |
|                                                                                 | Bleomycin 10                             | IV           | 1,15            |                                                                                                          |
|                                                                                 | Vinblastine 6                            | IV           | 1,15            |                                                                                                          |
|                                                                                 | Dacarbazine 375                          | IV           | 1,15            |                                                                                                          |
| 4×BEACOPP <sub>escalated</sub> <sup>+</sup><br>2-4× BEACOPP <sub>baseline</sub> | Bleomycin 10                             | IV           | 8               | Every 21 days (4 cycles of BEACOPP <sub>escalated</sub> plus 2-4 cycles of BEACOPP <sub>baseline</sub> ) |
|                                                                                 | Etoposide 200(E)-100(B)                  | IV           | 1-3             |                                                                                                          |
|                                                                                 | Doxorubicin 35(E)-25(B)                  | IV           | 1               |                                                                                                          |
|                                                                                 | Cyclophosphamide 1250(E)-650(B)          | IV           | 1               |                                                                                                          |
|                                                                                 | Vincristine 1.4 (2 maximum)              | IV           | 8               |                                                                                                          |
|                                                                                 | Procarbazine 100                         | PO           | 1-7             |                                                                                                          |
|                                                                                 | Prednisone 40                            | PO           | 1-14            |                                                                                                          |
| A+AVD                                                                           | Doxorubicin 25                           | IV           | 1,15            | Every 28 days × 6 cycles                                                                                 |
|                                                                                 | Brentuximab vedotin 1.2mg/kg             | IV           | 1,15            |                                                                                                          |
|                                                                                 | Vinblastine 6                            | IV           | 1,15            |                                                                                                          |
|                                                                                 | Dacarbazine 375                          | IV           | 1,15            |                                                                                                          |
| Stanford V                                                                      | Mechlorethamine 6                        | IV           | 1               | Every 28 days × 3 cycles                                                                                 |
|                                                                                 | Doxorubicin 25                           | IV           | 1,15            |                                                                                                          |
|                                                                                 | Vinblastine 6                            | IV           | 1,15            |                                                                                                          |
|                                                                                 | Prednisone 40                            | PO           | every other day |                                                                                                          |
|                                                                                 | Vincristine 1.4 (2 maximum)              | IV           | 8,22            |                                                                                                          |
|                                                                                 | Bleomycin 5                              | IV           | 8,22            |                                                                                                          |
|                                                                                 | Etoposide 60 mg/m <sup>2</sup> /d        | IV           | 15,16           |                                                                                                          |

|                                |                              |      |       |                            |
|--------------------------------|------------------------------|------|-------|----------------------------|
| MOPP                           | Mechlorethamine 6            | IV   | 1,8   | Every 28 days × 6-8 cycles |
|                                | Vincristine 1.4              | IV   | 1,8   |                            |
|                                | Procarbazine 100             | PO   | 1-14  |                            |
|                                | Prednisone 40                | PO   | 1-14  |                            |
| M[C]OPP/ABVD                   | Mechlorethamine 6            | IV   | 1     | Every 56 days × 8 cycles   |
|                                | [Cyclophosphamide 650]       | [IV] | [1,8] |                            |
|                                | Vincristine 1.4(2 maximum)   | IV   | 1,8   |                            |
|                                | Procarbazine 100             | PO   | 1-14  |                            |
|                                | Prednisone 40                | PO   | 1-14  |                            |
|                                | Doxorubicin 25               | IV   | 29,43 |                            |
|                                | Bleomycin 10                 | IV   | 29,43 |                            |
|                                | Vinblastine 6                | IV   | 29,43 |                            |
|                                | Dacarbazine 375              | IV   | 29,43 |                            |
| 8×BEACOPP <sub>escalated</sub> | Bleomycin 10                 | IV   | 8     | Every 21 days × 8 cycles   |
|                                | Etoposide 200                | IV   | 1-3   |                            |
|                                | Doxorubicin 35               | IV   | 1     |                            |
|                                | Cyclophosphamide 1200        | IV   | 1     |                            |
|                                | Vincristine 1.4(2 maximum)   | IV   | 8     |                            |
|                                | Procarbazine 100             | PO   | 1-7   |                            |
|                                | Prednisone 40                | PO   | 1-14  |                            |
| MOPP/ABV Hybrid                | Mechlorethamine 6            | IV   | 1     | Every 28 days × 6 cycles   |
|                                | Vincristine 1.4              | IV   | 1     |                            |
|                                | Prednisone 40                | PO   | 1-14  |                            |
|                                | Procarbazine 100             | PO   | 1-7   |                            |
|                                | Doxorubicin 35               | IV   | 8     |                            |
|                                | Bleomycin 10U/m <sup>2</sup> | IV   | 8     |                            |

|                                |                             |      |                            |                          |
|--------------------------------|-----------------------------|------|----------------------------|--------------------------|
|                                | Vinblastine 6               | IV   | 8                          |                          |
| M[C]EC                         | Mechlorethamine 6           | IV   | 1, cycles 1, 3, and 5 only | Every 28 days × 6 cycles |
|                                | [Cyclophosphamide 650]      | [IV] | [1,cycles 1,3 and 5 only]  |                          |
|                                | Lomustine 100               | PO   | 1,cycles 2,4 and 6 only    |                          |
|                                | Vindesine 3                 | IV   | 1                          |                          |
|                                | Melphalan 6                 | PO   | 1-3                        |                          |
|                                | Prednisone 40               | PO   | 1-14                       |                          |
|                                | Epidoxorubicin 40           | IV   | 8                          |                          |
|                                | Vincristine 1.4 (2 maximum) | IV   | 8                          |                          |
|                                | Procarbazine 100            | PO   | 8-14                       |                          |
|                                | Vinblastine 6               | IV   | 15                         |                          |
|                                | Bleomycin 10                | IV   | 15                         |                          |
| 8×BEACOPP <sub>baseline</sub>  | Bleomycin 10                | IV   | 8                          | Every 21 days × 8 cycles |
|                                | Etoposide 100               | IV   | 1-3                        |                          |
|                                | Doxorubicin 25              | IV   | 1                          |                          |
|                                | Cyclophosphamide 650        | IV   | 1                          |                          |
|                                | Vincristine 1.4 (2 maximum) | IV   | 8                          |                          |
|                                | Procarbazine 100            | PO   | 1-7                        |                          |
|                                | Prednisone 40               | PO   | 1-14                       |                          |
| 6×BEACOPP <sub>escalated</sub> | Bleomycin 10                | IV   | 8                          | Every 21 days × 6 cycles |
|                                | Etoposide 200               | IV   | 1-3                        |                          |
|                                | Doxorubicin 35              | IV   | 1                          |                          |
|                                | Cyclophosphamide 1200       | IV   | 1                          |                          |
|                                | Vincristine 1.4 (2 maximum) | IV   | 8                          |                          |
|                                | Procarbazine 100            | PO   | 1-7                        |                          |
|                                | Prednisone 40               | PO   | 1-14                       |                          |

|                         |                            |    |      |                             |
|-------------------------|----------------------------|----|------|-----------------------------|
| 8×BEACOPP <sub>14</sub> | Cyclophosphamide 650       | IV | 1    | Every 14 days × 8<br>cycles |
|                         | Doxorubicin 25             | IV | 1    |                             |
|                         | Etoposide 100              | IV | 1-3  |                             |
|                         | Procarbazine 100           | PO | 1-7  |                             |
|                         | Prednisone 80              | PO | 1-7  |                             |
|                         | Vincristine 1.4(2 maximum) | IV | 8    |                             |
|                         | Bleomycin 10               | IV | 8    |                             |
|                         | G-CSF 300/400 ug           | SC | 8-13 |                             |

Abbreviations: E=escalated, B=baseline, IV=intravenously, PO=orally, SC=subcutaneously.



**Table S5** The surface under the cumulative ranking (SUCRA) value of 12 combined chemotherapy for overall survival (OS) and completion remission (CR).

|                                                                 | SUCRA |      |
|-----------------------------------------------------------------|-------|------|
|                                                                 | OS    | CR   |
| ABVD                                                            | 32.3  | 43.5 |
| 4×BEACOPP <sub>escalated</sub> +2-4×BEACOPP <sub>baseline</sub> | 60.6  | 69.5 |
| A+AVD                                                           | 68.5  | 57.3 |
| Stanford V                                                      | 47.2  | 28.5 |
| MOPP                                                            | 19.1  | 1.2  |
| M[C]OPP/ABVD                                                    | 10.6  | 24.8 |
| 8×BEACOPP <sub>escalated</sub>                                  | 64.5  | 82.3 |
| MOPP/ABV Hybrid                                                 | 35.5  | 58.7 |
| M[C]EC                                                          | 50.6  | 10.9 |
| 8×BEACOPP <sub>baseline</sub>                                   | 38.7  | 32.9 |
| 6×BEACOPP <sub>escalated</sub>                                  | 86.5  | 99.3 |
| 8×BEACOPP <sub>14</sub>                                         | 86.0  | 91.0 |

**Abbreviations:** ABVD= doxorubicin, bleomycin, vinblastine, and dacarbazine; BEACOPP<sub>escalated</sub>= increased dose of bleomycin, etoposide, doxorubicin, cyclophosphamide, vincristine, procarbazine, prednisone. BEACOPP<sub>baseline</sub>=standard-dose of bleomycin, etoposide, doxorubicin, cyclophosphamide, vincristine, procarbazine, and prednisone. M[C]OPP=mechlorethamine [cyclophosphamide], vincristine, procarbazine, prednisone. Stanford V=doxorubicin, vinblastine, mechlorethamine, vincristine, bleomycin, etoposide, and prednisone combined with radiation therapy. EBV=epidoxorubicin, bleomycin, vinblastine. CAD=lomustine, doxorubicin, vindesine. A+AVD= brentuximab vedotin plus AVD.

**Figure S1**

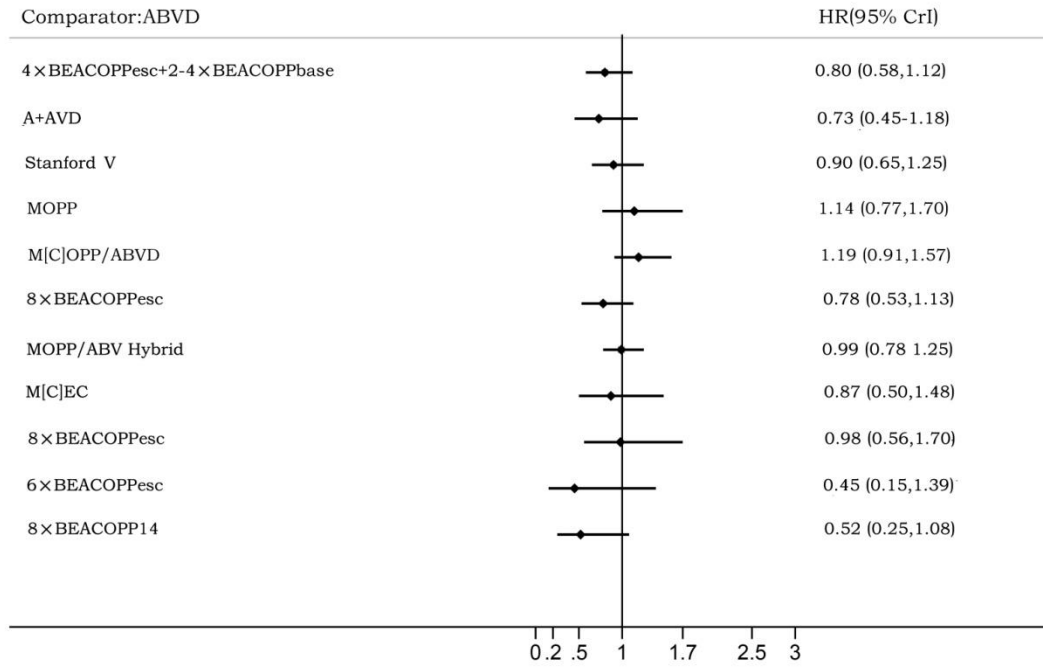

**Figure S2**

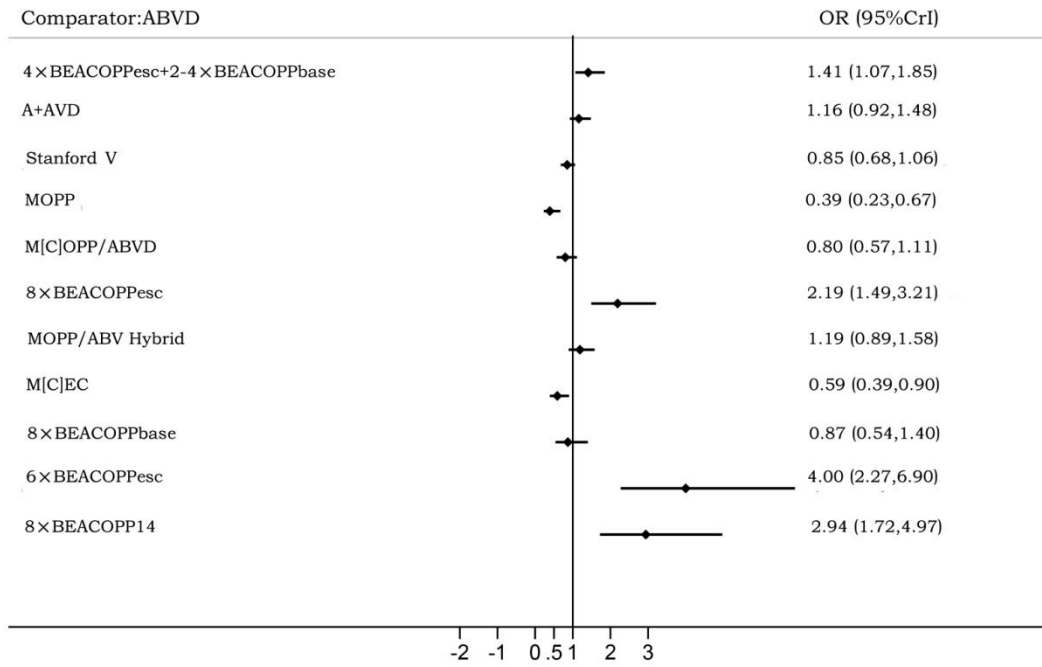

Supplement: Supplementary file 1 [file get_supplementary_file.php]
